# Supplementary material
Source: PubMed Central journal article supplement (PMC3484644)
Supplement: mmc1.pdf [file mmc1.pdf]

## Supplemental Data

### Population Genetic Inference from Personal Genome Data: Impact of Ancestry and Admixture on Human Genomic Variation

Jeffrey M. Kidd, Simon Gravel, Jake Byrnes, Andres Moreno-Estrada, Shaila Musharoff, Katarzyna Bryc, Jeremiah D. Degenhardt, Abra Brisbin, Vrunda Sheth, Rong Chen, Stephen F. McLaughlin, Heather E. Peckham, Larsson Omberg, Christina A. Bormann Chung, Sarah Stanley, Kevin Pearlstein, Elizabeth Levandowsky, Suehelay Acevedo-Acevedo, Adam Auton, Alon Keinan, Victor Acuña-Alonzo, Rodrigo Barquera-Lozano, Samuel Canizales-Quinteros, Celeste Eng, Esteban G. Burchard, Archie Russell, Andy Reynolds, Andrew G. Clark, Martin G. Reese, Stephen E. Lincoln, Atul J. Butte, Francisco M. De La Vega, and Carlos D. Bustamante

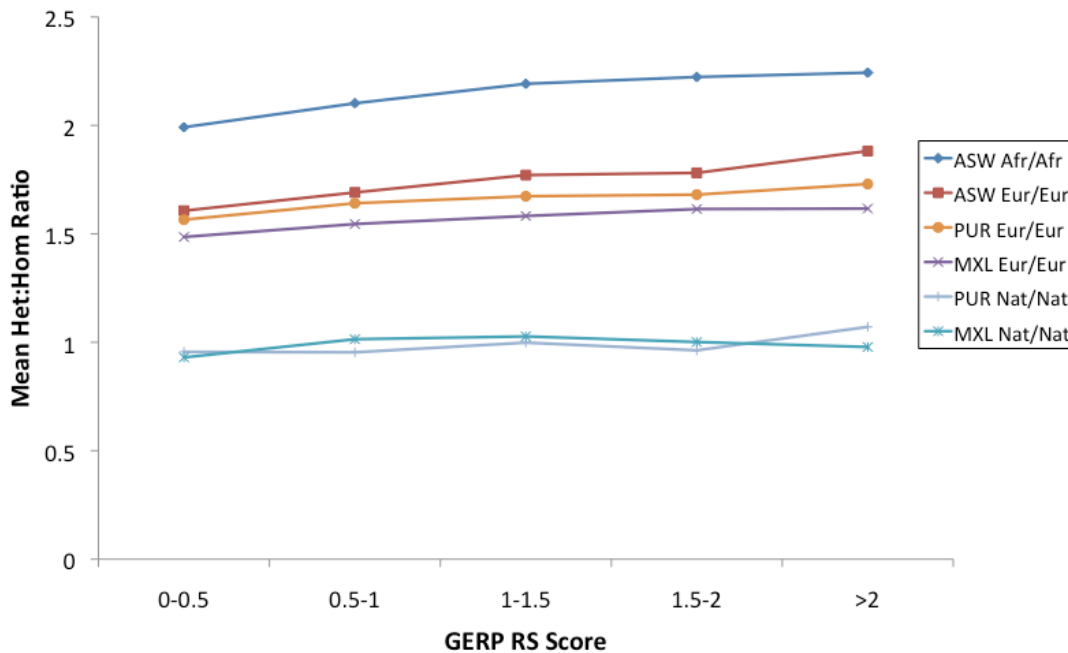

**Figure S1. Relationship between Sequence Constraint and Ancestry**

The ratio of heterozygous to homozygous variants for each indicated ancestry is shown stratified by the GERP RS score. Higher RS scores indicate stronger evolutionary constraint.

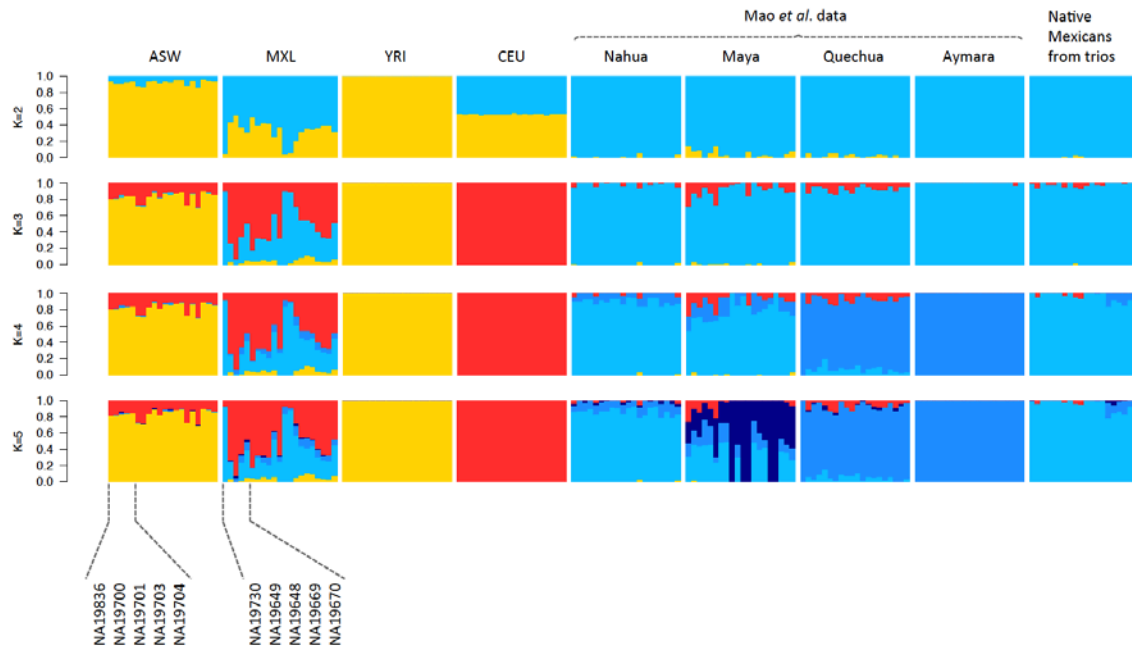

**Figure S2. Admixture Analysis and Reference Panel Choice**

Admixture deconvolution with PCAdmix requires a phased reference panel. For this study, we used a set of 10 trios sampled from each source population, including Yoruba from Ibadan (YRI), European-Americans from Utah (CEU), and a combined sample of Native American groups from Mexico. The analysis was performed using ADMIXTURE<sup>46</sup> with 352,095 SNPs common to all reference panels, including genotype data from Mao et al.<sup>47</sup>. ASW and MXL individuals with genome sequence data available are indicated.

**A**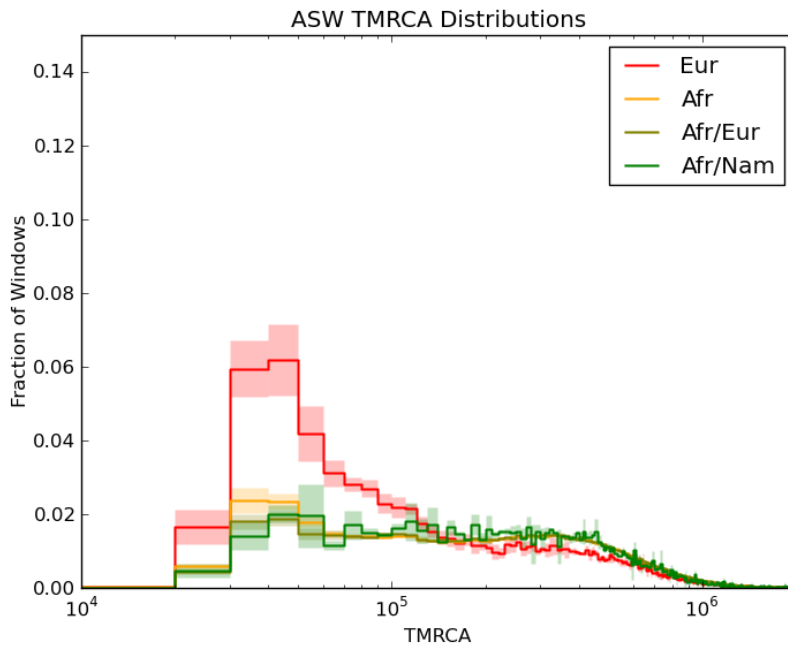**B**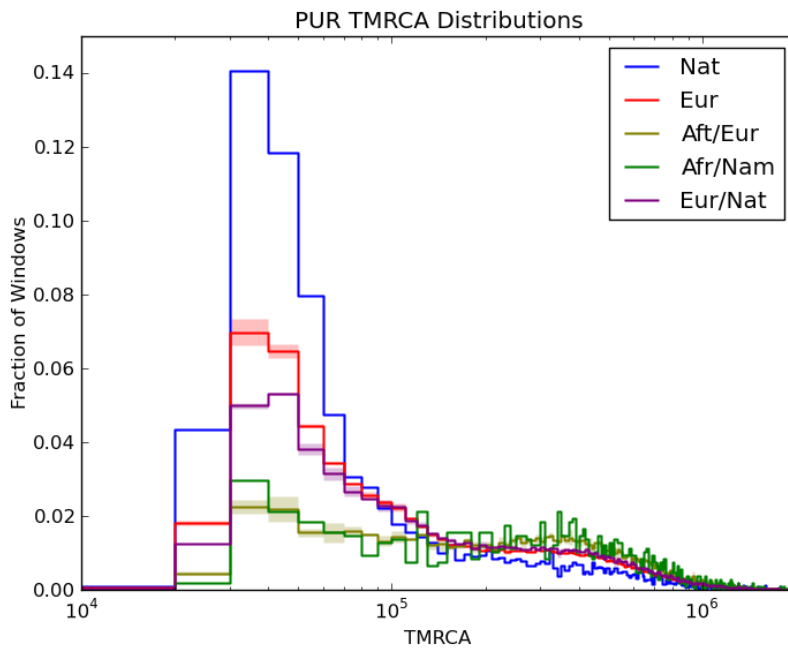**Figure S3. Distribution of Inferred T<sub>MRCAs</sub>**

The distribution of inferred T<sub>MRCAs</sub> calculated in 10 kb windows scaled using chimpanzee divergence are shown for (A) ASW and (B) PUR individuals

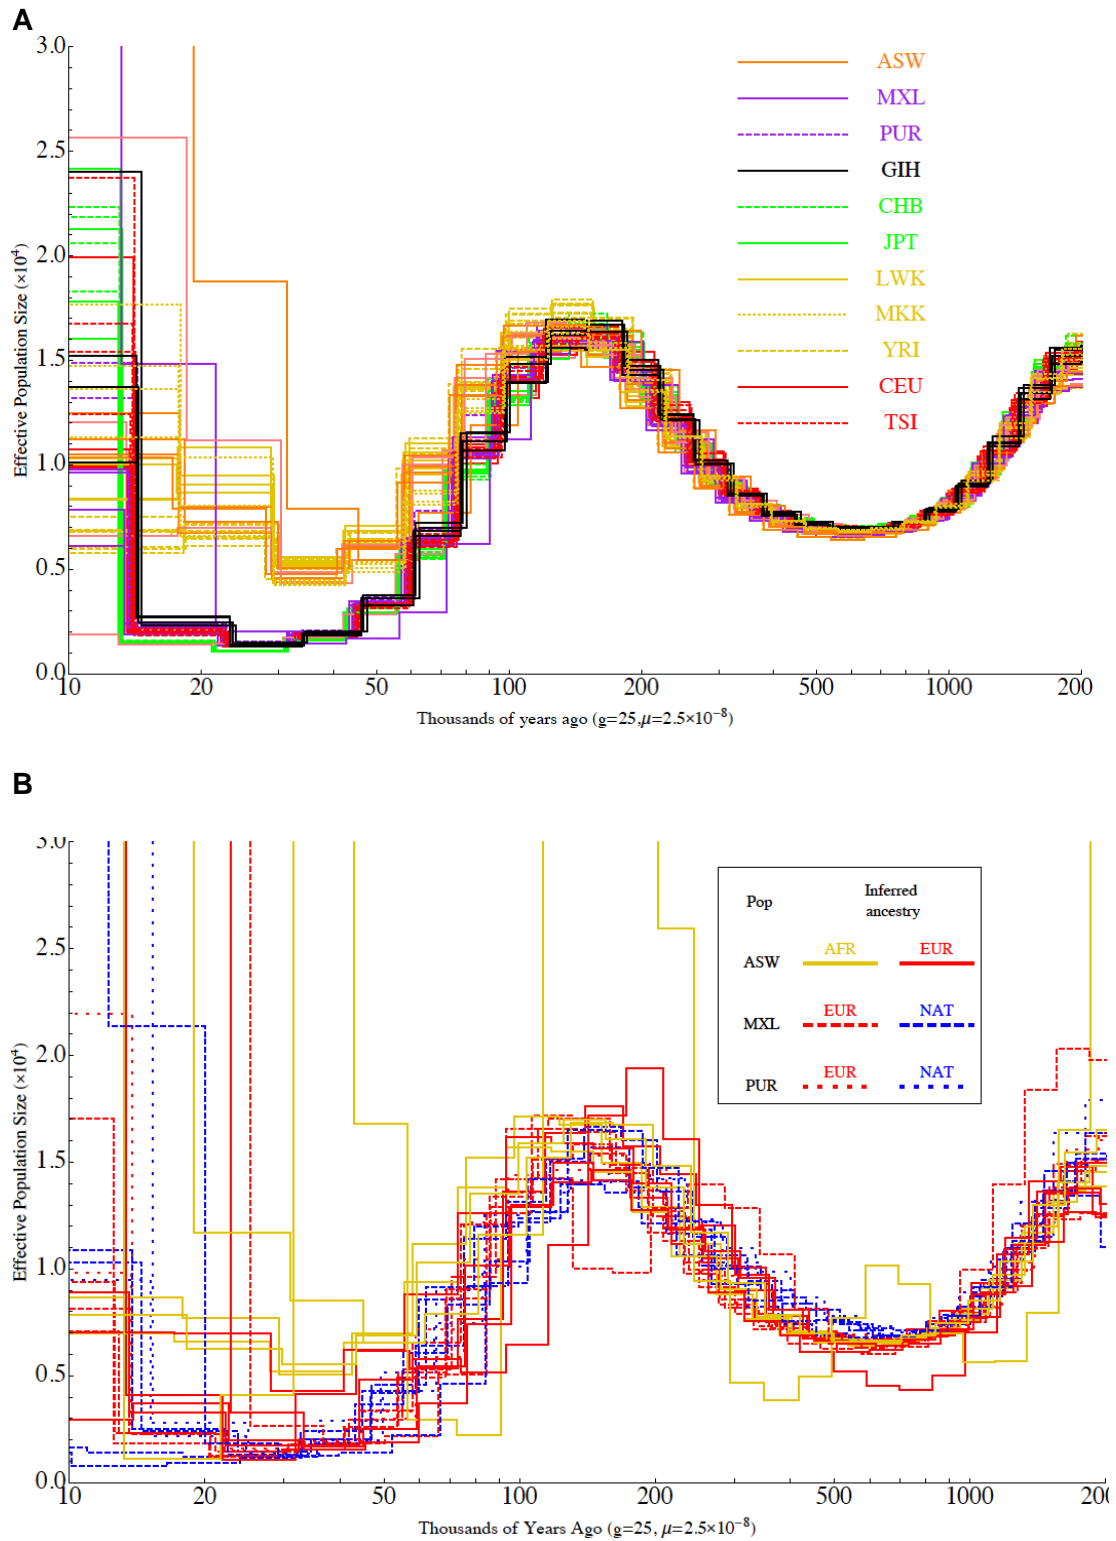

**Figure S4. Demographic History Inferred with PSMC**

PSMC results are shown for each individual separately for each population (A) and for each inferred ancestry following admixture deconvolution (B).

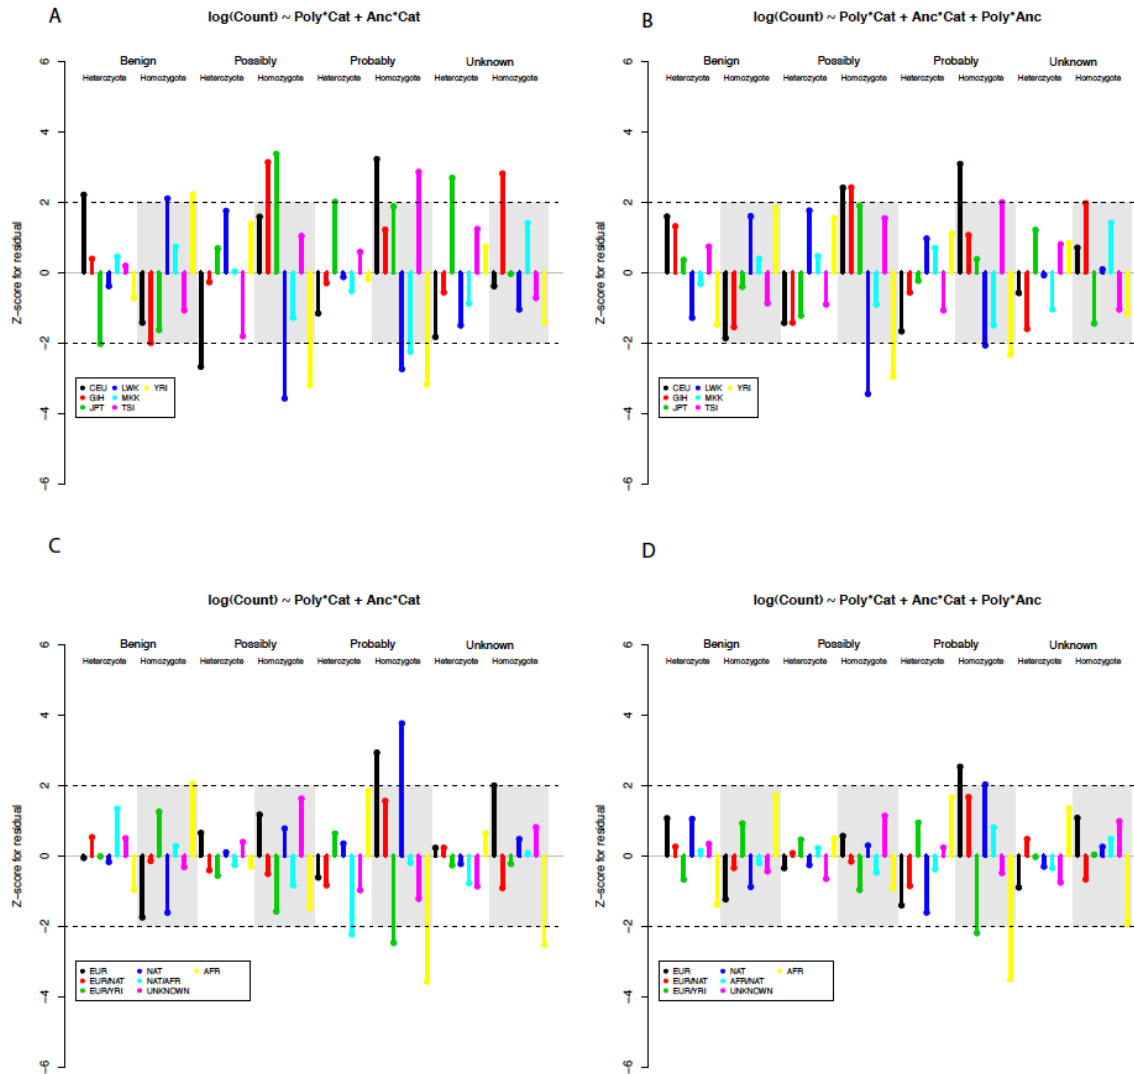

**Figure S5. Residuals from Models of PolyPhen Counts**

Z score residuals are shown for models of PolyPhen counts that consider pairwise interactions between PolyPhen status, zygosity category, and ancestry for the studied populations (A and B) and for the deconvolved ancestries of admixed individuals (C and D). Analysis was limited to those samples sequenced by Complete Genomics. This significant residuals observed in each case demonstrate the necessity of the PolyPhen\*Catetogy\*Ancestry interaction term.

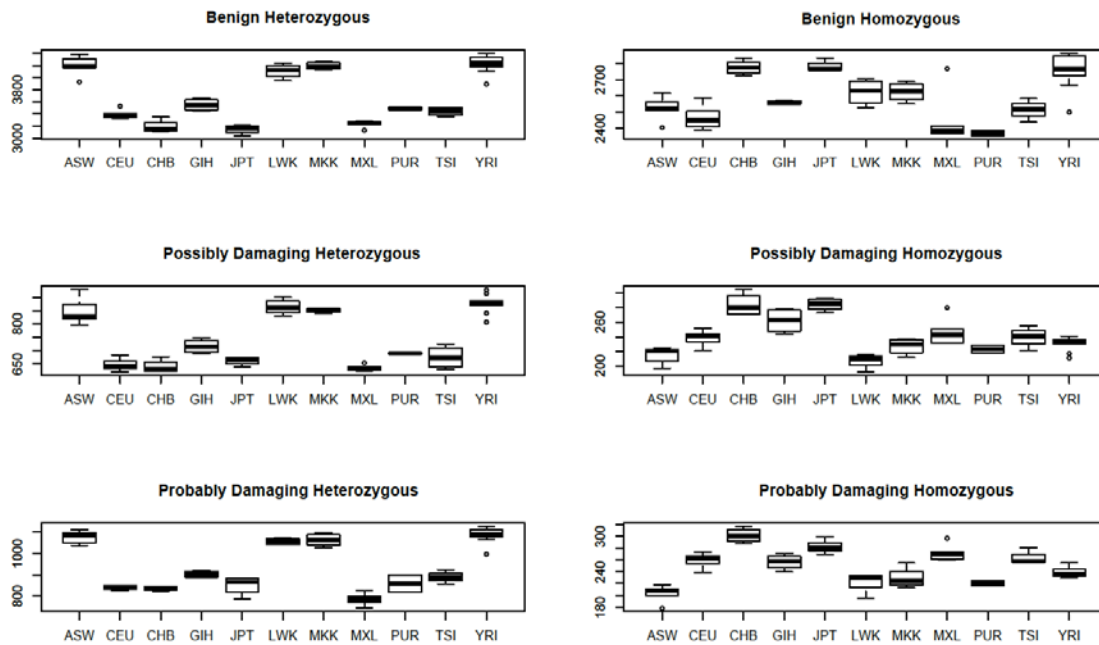

**Figure S6. Distribution of Counts for PolyPhen Categories**

Autosomal variant counts are reported for each population for each PolyPhen prediction and zygosity category. Analysis was limited to those samples sequenced by Complete Genomics.

**Table S1. Genotype Concordance**

**A**

| <b>Sample</b> | <b>Population</b> | <b>HomRef</b> | <b>Het</b> | <b>HomAlt</b> |
|---------------|-------------------|---------------|------------|---------------|
| NA19700       | ASW               | 99.95%        | 99.85%     | 99.49%        |
| NA19701       | ASW               | 99.95%        | 99.80%     | 99.50%        |
| NA19703       | ASW               | 99.95%        | 99.90%     | 99.50%        |
| NA19704       | ASW               | 99.95%        | 99.83%     | 99.51%        |
| NA06985       | CEU               | 99.92%        | 98.12%     | 99.43%        |
| NA06994       | CEU               | 99.98%        | 98.73%     | 99.56%        |
| NA07357       | CEU               | 99.98%        | 99.90%     | 99.58%        |
| NA18526       | CHB               | 99.98%        | 99.92%     | 99.60%        |
| NA18537       | CHB               | 99.97%        | 99.60%     | 99.60%        |
| NA18555       | CHB               | 99.97%        | 99.94%     | 99.60%        |
| NA18558       | CHB               | 99.95%        | 99.81%     | 99.57%        |
| NA20845       | GIH               | 99.97%        | 99.81%     | 99.54%        |
| NA20846       | GIH               | 99.97%        | 99.93%     | 99.55%        |
| NA20847       | GIH               | 99.97%        | 99.92%     | 99.54%        |
| NA20850       | GIH               | 99.97%        | 99.86%     | 99.55%        |
| NA18940       | JPT               | 99.96%        | 99.84%     | 99.59%        |
| NA18942       | JPT               | 99.97%        | 99.93%     | 99.60%        |
| NA18947       | JPT               | 99.97%        | 99.63%     | 99.59%        |
| NA18956       | JPT               | 99.97%        | 99.86%     | 99.59%        |
| NA21733       | MKK               | 99.94%        | 99.42%     | 99.50%        |
| NA19649       | MXL               | 99.97%        | 99.75%     | 99.55%        |
| NA19669       | MXL               | 99.97%        | 99.68%     | 99.58%        |
| NA19670       | MXL               | 99.97%        | 99.87%     | 99.57%        |
| NA20502       | TSI               | 99.97%        | 99.68%     | 99.53%        |
| NA20509       | TSI               | 99.97%        | 99.85%     | 99.55%        |
| NA20510       | TSI               | 99.97%        | 99.88%     | 99.55%        |
| NA18501       | YRI               | 99.95%        | 99.90%     | 99.51%        |
| NA18504       | YRI               | 99.95%        | 99.90%     | 99.52%        |
| NA18505       | YRI               | 99.95%        | 99.91%     | 99.54%        |
| NA18508       | YRI               | 99.96%        | 99.90%     | 99.53%        |
| NA18517       | YRI               | 99.95%        | 99.84%     | 99.53%        |
| NA19129       | YRI               | 99.96%        | 99.89%     | 99.55%        |
| NA19238       | YRI               | 99.95%        | 99.83%     | 99.54%        |
| NA19239       | YRI               | 99.96%        | 99.88%     | 99.53%        |
| <b>Mean</b>   |                   | 99.96%        | 99.75%     | 99.55%        |

**B**

| <b>Sample</b> | <b>Population</b> | <b>HomRef</b> | <b>Het</b> | <b>HomAlt</b> |
|---------------|-------------------|---------------|------------|---------------|
| NA19836       | ASW               | 99.94%        | 98.41%     | 97.43%        |
| NA19730       | MXL               | 99.94%        | 98.00%     | 98.75%        |
| <b>Mean</b>   |                   | 99.94%        | 98.21%     | 98.09%        |

Genotype concordance is given for subset of samples sequenced by Complete Genomics (A) and SOLiD (B) relative to genotypes from the HapMap Project Phase 3.

**Table S2. Sequence Diversity Summary**

**A**

| Population | Samples | Callable Bp per Sample | SNPs per Kilobase per Sample | Mean Heterozygosity *10 <sup>-3</sup> | Novel SNPs per Sample | NonSyn:Syn Allele Count per Sample |
|------------|---------|------------------------|------------------------------|---------------------------------------|-----------------------|------------------------------------|
| YRI        | 9       | 2,598,173,495          | 1.51                         | 0.998                                 | 3.8%                  | 0.842                              |
| ASW        | 4       | 2,578,256,849          | 1.45                         | 0.981                                 | 5.3%                  | 0.842                              |
| MKK        | 4       | 2,600,975,555          | 1.47                         | 0.979                                 | 7.0%                  | 0.848                              |
| LWK        | 4       | 2,575,705,972          | 1.47                         | 0.979                                 | 6.7%                  | 0.846                              |
| GIH        | 4       | 2,609,837,580          | 1.28                         | 0.784                                 | 3.8%                  | 0.857                              |
| PUR        | 2       | 2,594,712,021          | 1.26                         | 0.782                                 | 3.0%                  | 0.858                              |
| TSI        | 4       | 2,605,098,621          | 1.25                         | 0.761                                 | 2.9%                  | 0.867                              |
| CEU        | 5       | 2,597,855,813          | 1.24                         | 0.755                                 | 1.8%                  | 0.864                              |
| MXL        | 4       | 2,576,042,930          | 1.21                         | 0.743                                 | 3.0%                  | 0.856                              |
| CHB        | 4       | 2,606,261,347          | 1.25                         | 0.718                                 | 2.8%                  | 0.864                              |
| JPT        | 4       | 2,601,200,458          | 1.25                         | 0.717                                 | 2.7%                  | 0.866                              |

**B**

| Population   | Samples | Callable Bp per Sample | SNPs per Kilobase per Sample | Mean Heterozygosity *10 <sup>-3</sup> | Novel SNPs per Sample | NonSyn:Syn Allele Count per Sample |
|--------------|---------|------------------------|------------------------------|---------------------------------------|-----------------------|------------------------------------|
| <b>ASW</b>   |         |                        |                              |                                       |                       |                                    |
| Afr/Afr      | 4       | 1,711,944,548          | 1.47                         | 0.979                                 | 5.9%                  | 0.832                              |
| Eur/Eur      | 4       | 53,078,411             | 1.18                         | 0.729                                 | 2.7%                  | 0.841                              |
| Afr/Eur      | 4       | 610,389,450            | 1.42                         | 0.999                                 | 4.1%                  | 0.856                              |
| Eur/Nat      | 2       | 5,467,801              | 1.14                         | 0.831                                 | 3.4%                  | 0.782                              |
| Afr/Nat      | 4       | 37,223,156             | 1.43                         | 1.005                                 | 4.5%                  | 0.881                              |
| Not assigned | 4       | 162,887,384            | 1.50                         | 1.025                                 | 4.9%                  | 0.884                              |
| <b>MXL</b>   |         |                        |                              |                                       |                       |                                    |
| Afr/Afr      | 3       | 3,145,648              | 1.42                         | 0.877                                 | 6.2%                  | 0.518                              |
| Eur/Eur      | 4       | 1,126,011,138          | 1.18                         | 0.703                                 | 2.8%                  | 0.864                              |
| Afr/Eur      | 4       | 81,605,200             | 1.34                         | 0.937                                 | 4.1%                  | 0.816                              |
| Eur/Nat      | 4       | 670,517,775            | 1.24                         | 0.791                                 | 3.0%                  | 0.862                              |
| Nat/Nat      | 4       | 173,058,489            | 1.17                         | 0.567                                 | 3.0%                  | 0.757                              |
| Afr/Nat      | 4       | 38,004,649             | 1.31                         | 0.917                                 | 4.3%                  | 0.996                              |
| Not assigned | 4       | 484,258,654            | 1.26                         | 0.796                                 | 3.2%                  | 0.844                              |
| <b>PUR</b>   |         |                        |                              |                                       |                       |                                    |
| Afr/Afr      | 1       | 2,370,069              | 1.52                         | 0.981                                 | 3.9%                  | 0.000                              |
| Eur/Eur      | 2       | 1,667,365,559          | 1.23                         | 0.751                                 | 2.8%                  | 0.865                              |
| Afr/Eur      | 2       | 119,098,072            | 1.47                         | 1.036                                 | 4.1%                  | 0.865                              |
| Eur/Nat      | 2       | 308,502,582            | 1.24                         | 0.794                                 | 3.1%                  | 0.907                              |
| Nat/Nat      | 2       | 23,382,334             | 1.21                         | 0.582                                 | 3.1%                  | 0.668                              |
| Afr/Nat      | 2       | 10,807,890             | 1.53                         | 1.080                                 | 3.8%                  | 0.622                              |
| Not assigned | 2       | 464,370,551            | 1.29                         | 0.816                                 | 3.1%                  | 0.814                              |

**C**

| Population           | Callable Bp per Sample | SNPs per Kilobase | Heterozygosity *10 <sup>-3</sup> | Novel SNPs | NonSyn:Syn Allele Count |
|----------------------|------------------------|-------------------|----------------------------------|------------|-------------------------|
| <b>ASW (NA19836)</b> |                        |                   |                                  |            |                         |
| Afr/Afr              | 2,465,426,377          | 1.69              | 1.129                            | 7.6%       | 0.870                   |
| Eur/Eur              | 1,470,327,580          | 1.69              | 1.118                            | 8.4%       | 0.842                   |
| Afr/Eur              | 128,032,937            | 1.37              | 0.788                            | 5.1%       | 0.887                   |
| Eur/Nat              | 663,648,162            | 1.70              | 1.188                            | 6.3%       | 0.901                   |
| Afr/Nat              | 5,253,481              | 1.54              | 0.868                            | 4.6%       | 0.278                   |
| Not assigned         | 3,081,266              | 2.01              | 1.410                            | 7.7%       | 0.628                   |
| Not assigned         | 195,082,951            | 1.80              | 1.245                            | 7.9%       | 0.971                   |
| <b>MXL (NA19730)</b> |                        |                   |                                  |            |                         |
| Eur/Eur              | 2,433,504,691          | 1.40              | 0.785                            | 6.3%       | 0.875                   |
| Afr/Eur              | 21,608,276             | 1.44              | 0.899                            | 5.6%       | 1.045                   |
| Eur/Nat              | 443,987                | 2.74              | 1.651                            | 3.5%       | 0.000                   |
| Nat/Nat              | 341,574,989            | 1.47              | 0.921                            | 5.7%       | 0.864                   |
| Afr/Nat              | 1,707,489,841          | 1.37              | 0.730                            | 6.4%       | 0.877                   |
| Not assigned         | 50,849,701             | 1.55              | 1.087                            | 7.6%       | 0.718                   |
| Not assigned         | 311,537,897            | 1.49              | 0.880                            | 6.4%       | 0.899                   |

(A) All samples were sequenced by Complete Genomics. Novel SNPs were determined relative to variants discovered by the 1000 Genomes low-coverage sequencing pilot, limited to genomic positions interrogated by the project.



(B) Sequence variation was recalculated based on the assignment of each genome into diploid source population classifications as indicated. Only individuals having at least 1 MB of each assigned ancestry are included. Only samples sequenced using Complete Genomics technology are shown.

(C) Diversity statistics obtained for NA19836 and NA19730, sequenced using the SOLiD technology.

**Table S3. Ancestry Assignment Proportions**

| Sample Name | Population | Eur/Eur | Nat/Nat | Afr/Afr | Eur/Nat | Afr/Eur | Eur/Nat | Not Assigned |
|-------------|------------|---------|---------|---------|---------|---------|---------|--------------|
| NA19700     | ASW        | 3.5%    | 0.0%    | 63.5%   | 0.0%    | 27.5%   | 0.1%    | 5.4%         |
| NA19701     | ASW        | 0.7%    | 0.0%    | 65.1%   | 0.3%    | 22.6%   | 4.8%    | 6.4%         |
| NA19703     | ASW        | 2.0%    | 0.0%    | 70.1%   | 0.1%    | 21.1%   | 0.3%    | 6.4%         |
| NA19704     | ASW        | 2.0%    | 0.0%    | 66.9%   | 0.0%    | 23.2%   | 0.6%    | 7.3%         |
| NA19836     | ASW        | 5.2%    | 0.0%    | 59.6%   | 0.2%    | 26.6%   | 0.1%    | 8.3%         |
| NA19730     | MXL        | 0.9%    | 70.2%   | 0.0%    | 13.9%   | 0.0%    | 2.1%    | 13.0%        |
| NA19648     | MXL        | 75.9%   | 0.2%    | 0.1%    | 8.4%    | 1.8%    | 0.1%    | 13.6%        |
| NA19649     | MXL        | 45.5%   | 5.5%    | 0.0%    | 23.4%   | 4.2%    | 0.4%    | 20.9%        |
| NA19669     | MXL        | 34.7%   | 6.2%    | 0.1%    | 33.4%   | 3.0%    | 1.2%    | 21.4%        |
| NA19670     | MXL        | 18.3%   | 14.9%   | 0.2%    | 39.0%   | 3.6%    | 4.3%    | 19.6%        |
| HG00731     | PUR        | 70.4%   | 0.4%    | 0.0%    | 9.3%    | 3.2%    | 0.4%    | 16.3%        |
| HG00732     | PUR        | 57.9%   | 1.4%    | 0.1%    | 14.5%   | 5.9%    | 0.4%    | 19.8%        |

The fraction of the genome of each sample assigned to each ancestral category is listed. Assignment was performed using a 0.9 posterior-probability threshold obtained from the forward-backward algorithm in PCAdmix.

**Table S4. Log-Likelihood and Akaike Information Criteria Results for Model Comparison**

| Data set              | Model: $\log(\text{Counts}) \sim \cdot, \text{family}=\text{poisson}()$ | AIC      | LL        | DOF | AIC Difference |
|-----------------------|-------------------------------------------------------------------------|----------|-----------|-----|----------------|
| All Genomes           | Pop*Zyg+Zyg*Poly+Poly*Pop                                               | 4137.1   | -2010.55  | 58  |                |
|                       | Population * Zygosity * PolyPhen                                        | 3981.065 | -1902.53  | 88  | 156.03         |
| Admixed with Ancestry | Indiv*Anc+Anc*Zyg+Zyg*Poly+Poly*Anc                                     | 3177.209 | -1494.604 | 94  |                |
|                       | Indiv*Anc+Anc*Zyg*Poly                                                  | 3146.372 | -1461.186 | 112 | 30.84          |
| Deconvolution         | Indiv*Anc+Pop*Zyg+Anc*Zyg*Poly                                          | 3089.738 | -1430.869 | 114 | 56.63          |

**Table S5. Model Coefficients for Individual Sample Analysis by Population**

| <b>Coefficients</b>                 | <b>Estimate</b> | <b>Std Error</b> | <b>z value</b> | <b>Pr(&gt; z )</b> |
|-------------------------------------|-----------------|------------------|----------------|--------------------|
| (Intercept)                         | 8.3414102       | 0.0069056        | 1207.922       | <2e-16             |
| PolyphenPossibly                    | -1.5966446      | 0.0168253        | -94.895        | <2e-16             |
| PolyphenProbably                    | -1.3605904      | 0.0152838        | -89.022        | <2e-16             |
| PolyphenUnknown                     | -2.8336426      | 0.0293038        | -96.699        | <2e-16             |
| CategoryHomozygous                  | -0.5082063      | 0.0112676        | -45.103        | <2e-16             |
| AncestryCEU                         | -0.2134152      | 0.0103305        | -20.659        | <2e-16             |
| AncestryCHB                         | -0.2748887      | 0.0112319        | -24.474        | <2e-16             |
| AncestryGIH                         | -0.1674118      | 0.0108701        | -15.401        | <2e-16             |
| AncestryJPT                         | -0.2883181      | 0.011279         | -25.562        | <2e-16             |
| AncestryLWK                         | -0.0209012      | 0.010419         | -2.006         | 0.044849           |
| AncestryMKK                         | -0.0003577      | 0.0103594        | -0.035         | 0.972454           |
| AncestryMXL                         | -0.2606157      | 0.0104677        | -24.897        | <2e-16             |
| AncestryPUR                         | -0.1851869      | 0.013826         | -13.394        | <2e-16             |
| AncestryTSI                         | -0.1992014      | 0.0109743        | -18.152        | <2e-16             |
| AncestryYRI                         | 0.0063382       | 0.0086031        | 0.737          | 0.461285           |
| PolyphenPossibly:CategoryHomozygous | -0.868716       | 0.0359889        | -24.138        | <2e-16             |
| PolyphenProbably:CategoryHomozygous | -1.1603933      | 0.0360424        | -32.195        | <2e-16             |
| PolyphenUnknown:CategoryHomozygous  | -0.2757196      | 0.0520977        | -5.292         | 1.21E-07           |
| PolyphenPossibly:AncestryCEU        | -0.0586951      | 0.0255176        | -2.3           | 0.021438           |
| PolyphenProbably:AncestryCEU        | -0.035194       | 0.0230436        | -1.527         | 1.27E-01           |
| PolyphenUnknown:AncestryCEU         | -0.0611071      | 0.0445527        | -1.372         | 0.170198           |
| PolyphenPossibly:AncestryCHB        | -0.0084088      | 0.027426         | -0.307         | 0.759149           |
| PolyphenProbably:AncestryCHB        | 0.0220992       | 0.0247242        | 0.894          | 0.371413           |
| PolyphenUnknown:AncestryCHB         | 0.070426        | 0.0467006        | 1.508          | 0.131546           |
| PolyphenPossibly:AncestryGIH        | -0.0033246      | 0.0265067        | -0.125         | 0.900188           |
| PolyphenProbably:AncestryGIH        | -0.0085164      | 0.0241071        | -0.353         | 0.723883           |
| PolyphenUnknown:AncestryGIH         | -0.007637       | 0.0462267        | -0.165         | 0.868781           |
| PolyphenPossibly:AncestryJPT        | 0.0365496       | 0.0272236        | 1.343          | 0.179411           |
| PolyphenProbably:AncestryJPT        | 0.0524404       | 0.024644         | 2.128          | 0.033344           |
| PolyphenUnknown:AncestryJPT         | 0.127658        | 0.046138         | 2.767          | 0.00566            |
| PolyphenPossibly:AncestryLWK        | 0.0379977       | 0.025164         | 1.51           | 0.131044           |
| PolyphenProbably:AncestryLWK        | 0.0009034       | 0.0230552        | 0.039          | 0.968744           |
| PolyphenUnknown:AncestryLWK         | -0.0304774      | 0.0445737        | -0.684         | 0.494131           |
| PolyphenPossibly:AncestryMKK        | 0.0020042       | 0.0252288        | 0.079          | 0.936682           |
| PolyphenProbably:AncestryMKK        | -0.011847       | 0.0229884        | -0.515         | 0.606311           |
| PolyphenUnknown:AncestryMKK         | -0.0164082      | 0.0441505        | -0.372         | 0.71016            |
| PolyphenPossibly:AncestryMXL        | -0.0311551      | 0.0256931        | -1.213         | 0.225288           |
| PolyphenProbably:AncestryMXL        | -0.0547753      | 0.0234589        | -2.335         | 0.019546           |
| PolyphenUnknown:AncestryMXL         | -0.0597661      | 0.0451432        | -1.324         | 0.185528           |
| PolyphenPossibly:AncestryPUR        | -0.0236121      | 0.0339371        | -0.696         | 0.486579           |
| PolyphenProbably:AncestryPUR        | -0.0410289      | 0.0309809        | -1.324         | 0.185395           |
| PolyphenUnknown:AncestryPUR         | 0.045729        | 0.0577337        | 0.792          | 0.428321           |
| PolyphenPossibly:AncestryTSI        | -0.031222       | 0.0269508        | -1.158         | 0.246669           |
| PolyphenProbably:AncestryTSI        | 0.0079162       | 0.0242429        | 0.327          | 0.744017           |
| PolyphenUnknown:AncestryTSI         | 0.0562409       | 0.0458369        | 1.227          | 0.21983            |
| PolyphenPossibly:AncestryYRI        | 0.0243891       | 0.0208864        | 1.168          | 0.242926           |
| PolyphenProbably:AncestryYRI        | 0.0015626       | 0.0190366        | 0.082          | 0.934579           |
| PolyphenUnknown:AncestryYRI         | 0.0341053       | 0.0363007        | 0.94           | 0.347463           |
| CategoryHomozygous:AncestryCEU      | 0.1916177       | 0.0163404        | 11.727         | <2e-16             |
| CategoryHomozygous:AncestryCHB      | 0.3691895       | 0.0171929        | 21.473         | <2e-16             |
| CategoryHomozygous:AncestryGIH      | 0.1808956       | 0.0171811        | 10.529         | <2e-16             |
| CategoryHomozygous:AncestryJPT      | 0.3844207       | 0.0172191        | 22.325         | <2e-16             |
| CategoryHomozygous:AncestryLWK      | 0.0592946       | 0.016828         | 3.524          | 0.000426           |
| CategoryHomozygous:AncestryMKK      | 0.0391324       | 0.0167901        | 2.331          | 0.01977            |
| CategoryHomozygous:AncestryMXL      | 0.2364659       | 0.0164332        | 14.389         | <2e-16             |

|                                                 |            |           |        |          |
|-------------------------------------------------|------------|-----------|--------|----------|
| CategoryHomozygous:AncestryPUR                  | 0.1238932  | 0.0219348 | 5.648  | 1.62E-08 |
| CategoryHomozygous:AncestryTSI                  | 0.1955284  | 0.0172962 | 11.305 | <2e-16   |
| CategoryHomozygous:AncestryYRI                  | 0.0811062  | 0.0139153 | 5.829  | 5.59E-09 |
| PolyphenPossibly:CategoryHomozygous:AncestryCEU | 0.1865991  | 0.0508252 | 3.671  | 0.000241 |
| PolyphenProbably:CategoryHomozygous:AncestryCEU | 0.3031425  | 0.0494823 | 6.126  | 9.00E-10 |
| PolyphenUnknown:CategoryHomozygous:AncestryCEU  | 0.1696198  | 0.0744989 | 2.277  | 0.022798 |
| PolyphenPossibly:CategoryHomozygous:AncestryCHB | 0.1952388  | 0.0522948 | 3.733  | 1.89E-04 |
| PolyphenProbably:CategoryHomozygous:AncestryCHB | 0.2809786  | 0.0509453 | 5.515  | 3.48E-08 |
| PolyphenUnknown:CategoryHomozygous:AncestryCHB  | 0.0725263  | 0.0766674 | 0.946  | 0.344155 |
| PolyphenPossibly:CategoryHomozygous:AncestryGIH | 0.1903419  | 0.0525991 | 3.619  | 2.96E-04 |
| PolyphenProbably:CategoryHomozygous:AncestryGIH | 0.2309152  | 0.0521353 | 4.429  | 9.46E-06 |
| PolyphenUnknown:CategoryHomozygous:AncestryGIH  | 0.2573369  | 0.0761354 | 3.38   | 0.000725 |
| PolyphenPossibly:CategoryHomozygous:AncestryJPT | 0.1493586  | 0.0521799 | 2.862  | 4.21E-03 |
| PolyphenProbably:CategoryHomozygous:AncestryJPT | 0.1837998  | 0.0514487 | 3.572  | 0.000354 |
| PolyphenUnknown:CategoryHomozygous:AncestryJPT  | -0.0023948 | 0.0765084 | -0.031 | 0.975029 |
| PolyphenPossibly:CategoryHomozygous:AncestryLWK | -0.1115157 | 0.0542993 | -2.054 | 0.040003 |
| PolyphenProbably:CategoryHomozygous:AncestryLWK | 0.0522859  | 0.0530775 | 0.985  | 0.324582 |
| PolyphenUnknown:CategoryHomozygous:AncestryLWK  | 0.0743105  | 0.0773473 | 0.961  | 0.336684 |
| PolyphenPossibly:CategoryHomozygous:AncestryMKK | 0.0174284  | 0.0533294 | 0.327  | 0.743814 |
| PolyphenProbably:CategoryHomozygous:AncestryMKK | 0.0956651  | 0.0527234 | 1.814  | 0.069605 |
| PolyphenUnknown:CategoryHomozygous:AncestryMKK  | 0.1810454  | 0.0755754 | 2.396  | 0.016595 |
| PolyphenPossibly:CategoryHomozygous:AncestryMXL | 0.1984679  | 0.0506148 | 3.921  | 8.81E-05 |
| PolyphenProbably:CategoryHomozygous:AncestryMXL | 0.3747103  | 0.0493018 | 7.6    | 2.95E-14 |
| PolyphenUnknown:CategoryHomozygous:AncestryMXL  | 0.1883879  | 0.074663  | 2.523  | 1.16E-02 |
| PolyphenPossibly:CategoryHomozygous:AncestryPUR | 0.1242341  | 0.0679462 | 1.828  | 6.75E-02 |
| PolyphenProbably:CategoryHomozygous:AncestryPUR | 0.188265   | 0.0670703 | 2.807  | 0.005001 |
| PolyphenUnknown:CategoryHomozygous:AncestryPUR  | 0.1120045  | 0.0971163 | 1.153  | 0.248786 |
| PolyphenPossibly:CategoryHomozygous:AncestryTSI | 0.1445606  | 0.0536921 | 2.692  | 0.007094 |
| PolyphenProbably:CategoryHomozygous:AncestryTSI | 0.2566407  | 0.0519836 | 4.937  | 7.94E-07 |
| PolyphenUnknown:CategoryHomozygous:AncestryTSI  | 0.0337401  | 0.0780547 | 0.432  | 0.665551 |
| PolyphenPossibly:CategoryHomozygous:AncestryYRI | -0.039185  | 0.0443917 | -0.883 | 3.77E-01 |
| PolyphenProbably:CategoryHomozygous:AncestryYRI | 0.0812618  | 0.0439353 | 1.85   | 0.064374 |
| PolyphenUnknown:CategoryHomozygous:AncestryYRI  | 0.0221431  | 0.0637828 | 0.347  | 0.728468 |

**Table S6. Model Coefficients for Individual Sample Analysis by Deconvolved Ancestry**

| <b>Coefficients</b>                  | <b>Estimate</b> | <b>Std Error</b> | <b>z value</b> | <b>Pr(&gt; z )</b> |
|--------------------------------------|-----------------|------------------|----------------|--------------------|
| (Intercept)                          | 8.22668291      | 0.04378088       | 187.905819     | 0                  |
| IndividualHG00732PUR                 | -24.564109      | 1412.97649       | -0.0173847     | 0.98612975         |
| IndividualNA19648MXL                 | -24.564109      | 1412.97647       | -0.0173847     | 0.98612975         |
| IndividualNA19649MXL                 | -24.56411       | 1412.97643       | -0.0173847     | 0.98612975         |
| IndividualNA19669MXL                 | -24.564109      | 1412.97636       | -0.0173847     | 0.98612975         |
| IndividualNA19670MXL                 | -5.0498685      | 0.14158031       | -35.667872     | 1.25E-278          |
| IndividualNA19700ASW                 | -0.3555226      | 0.04504968       | -7.8917906     | 2.98E-15           |
| IndividualNA19701ASW                 | -0.4266798      | 0.0451856        | -9.4428269     | 3.63E-21           |
| IndividualNA19703ASW                 | -0.2900283      | 0.04493251       | -6.4547542     | 1.08E-10           |
| IndividualNA19704ASW                 | -0.3470768      | 0.04120995       | -8.4221605     | 3.70E-17           |
| AncestryEUR                          | -0.4767         | 0.04640445       | -10.272721     | 9.35E-25           |
| AncestryEUR/AFR                      | -3.5015719      | 0.07844127       | -44.639408     | 0                  |
| AncestryEUR/NAT                      | -2.3554046      | 0.05724522       | -41.145874     | 0                  |
| AncestryNAT                          | -6.4071867      | 0.22561442       | -28.398835     | 2.09E-177          |
| AncestryNAT/AFR                      | -6.3734686      | 0.28248045       | -22.562512     | 1.01E-112          |
| AncestryUNKNOWN                      | -1.8021414      | 0.03627417       | -49.681124     | 0                  |
| PolyphenPossibly                     | -1.6171629      | 0.02395205       | -67.516675     | 0                  |
| PolyphenProbably                     | -1.3444317      | 0.02143442       | -62.723027     | 0                  |
| PolyphenUnknown                      | -2.8286636      | 0.04126403       | -68.550353     | 0                  |
| CategoryHomozygous                   | -0.4407566      | 0.01557646       | -28.296328     | 3.83E-176          |
| IndividualHG00732PUR:AncestryEUR     | 24.3552884      | 1412.97649       | 0.01723687     | 0.98624765         |
| IndividualNA19648MXL:AncestryEUR     | 24.5472034      | 1412.97647       | 0.01737269     | 0.9861393          |
| IndividualNA19649MXL:AncestryEUR     | 24.0807833      | 1412.97643       | 0.01704259     | 0.98640264         |
| IndividualNA19669MXL:AncestryEUR     | 23.8490181      | 1412.97636       | 0.01687857     | 0.98653349         |
| IndividualNA19670MXL:AncestryEUR     | 3.57526256      | 0.14488774       | 24.6760884     | 1.93E-134          |
| IndividualNA19700ASW:AncestryEUR     | -2.9590163      | 0.08402561       | -35.215649     | 1.15E-271          |
| IndividualNA19701ASW:AncestryEUR     | -3.9672401      | 0.12846756       | -30.88126      | 2.13E-209          |
| IndividualNA19703ASW:AncestryEUR     | -3.3417515      | 0.0941385        | -35.498244     | 5.23E-276          |
| IndividualNA19704ASW:AncestryEUR     | -3.420141       | 0.09751055       | -35.074574     | 1.65E-269          |
| IndividualHG00732PUR:AncestryEUR/AFR | 25.6791155      | 1412.97649       | 0.01817377     | 0.98550022         |
| IndividualNA19648MXL:AncestryEUR/AFR | 23.9655206      | 1412.97648       | 0.01696102     | 0.98646771         |
| IndividualNA19649MXL:AncestryEUR/AFR | 24.9695749      | 1412.97643       | 0.01767161     | 0.98590083         |
| IndividualNA19669MXL:AncestryEUR/AFR | 25.0641326      | 1412.97636       | 0.01773854     | 0.98584744         |
| IndividualNA19670MXL:AncestryEUR/AFR | 5.46629265      | 0.16401833       | 33.3273278     | 1.55E-243          |
| IndividualNA19700ASW:AncestryEUR/AFR | 2.66305416      | 0.08107336       | 32.8474635     | 1.24E-236          |
| IndividualNA19701ASW:AncestryEUR/AFR | 2.5584472       | 0.08163435       | 31.3403286     | 1.32E-215          |
| IndividualNA19703ASW:AncestryEUR/AFR | 2.37204918      | 0.08164778       | 29.052218      | 1.44E-185          |
| IndividualNA19704ASW:AncestryEUR/AFR | 2.62667236      | 0.07907796       | 33.2162373     | 6.28E-242          |
| IndividualHG00732PUR:AncestryEUR/NAT | 24.9149577      | 1412.97649       | 0.01763296     | 0.98593166         |
| IndividualNA19648MXL:AncestryEUR/NAT | 24.7099258      | 1412.97647       | 0.01748785     | 0.98604742         |
| IndividualNA19649MXL:AncestryEUR/NAT | 25.4464564      | 1412.97643       | 0.01800912     | 0.98563158         |
| IndividualNA19669MXL:AncestryEUR/NAT | 25.6490309      | 1412.97636       | 0.01815248     | 0.98551721         |
| IndividualNA19670MXL:AncestryEUR/NAT | 6.37236575      | 0.14700497       | 43.3479622     | 0                  |
| IndividualNA19701ASW:AncestryEUR/NAT | -2.8033832      | 0.18581666       | -15.086823     | 1.98E-51           |
| IndividualNA19703ASW:AncestryEUR/NAT | -4.7963327      | 0.45083814       | -10.638702     | 1.97E-26           |
| IndividualHG00732PUR:AncestryNAT     | 25.5449386      | 1412.97651       | 0.01807881     | 0.98557598         |
| IndividualNA19648MXL:AncestryNAT     | 23.7168114      | 1412.97653       | 0.016785       | 0.98660814         |
| IndividualNA19649MXL:AncestryNAT     | 27.1614945      | 1412.97645       | 0.01922289     | 0.9846633          |
| IndividualNA19669MXL:AncestryNAT     | 27.5210014      | 1412.97638       | 0.01947733     | 0.98446032         |
| IndividualNA19670MXL:AncestryNAT     | 8.90102879      | 0.2620614        | 33.9654321     | 7.22E-253          |
| IndividualHG00732PUR:AncestryNAT/AFR | 24.6382174      | 1412.97654       | 0.0174371      | 0.98608791         |
| IndividualNA19648MXL:AncestryNAT/AFR | 24.7717486      | 1412.97652       | 0.01753161     | 0.98601252         |
| IndividualNA19649MXL:AncestryNAT/AFR | 25.495668       | 1412.97647       | 0.01804394     | 0.9856038          |
| IndividualNA19669MXL:AncestryNAT/AFR | 26.342965       | 1412.97639       | 0.0186436      | 0.98512542         |
| IndividualNA19670MXL:AncestryNAT/AFR | 8.40649759      | 0.31567234       | 26.6304534     | 3.01E-156          |
| IndividualNA19700ASW:AncestryNAT/AFR | -2.2094267      | 1.03872641       | -2.1270536     | 0.03341563         |
| IndividualNA19701ASW:AncestryNAT/AFR | 4.04381539      | 0.28465933       | 14.2058068     | 8.43E-46           |
| IndividualNA19703ASW:AncestryNAT/AFR | 1.33599688      | 0.32552885       | 4.10408128     | 4.06E-05           |

|                                                     |            |            |            |            |
|-----------------------------------------------------|------------|------------|------------|------------|
| IndividualNA19704ASW:AncestryNAT/AFR                | 1.41971359 | 0.32394    | 4.38264362 | 1.17E-05   |
| IndividualHG00732PUR:AncestryUNKNOWN                | 24.7103931 | 1412.97649 | 0.01748818 | 0.98604716 |
| IndividualNA19648MXL:AncestryUNKNOWN                | 24.3690487 | 1412.97647 | 0.01724661 | 0.98623988 |
| IndividualNA19649MXL:AncestryUNKNOWN                | 24.7473686 | 1412.97643 | 0.01751435 | 0.98602628 |
| IndividualNA19669MXL:AncestryUNKNOWN                | 24.8570514 | 1412.97636 | 0.01759198 | 0.98596435 |
| IndividualNA19670MXL:AncestryUNKNOWN                | 5.23605042 | 0.14115779 | 37.0935986 | 3.56E-301  |
| IndividualNA19700ASW:AncestryUNKNOWN                | -0.3690557 | 0.05270311 | -7.0025413 | 2.51E-12   |
| IndividualNA19701ASW:AncestryUNKNOWN                | -0.3701103 | 0.05383834 | -6.8744754 | 6.22E-12   |
| IndividualNA19703ASW:AncestryUNKNOWN                | -0.2093766 | 0.04974379 | -4.2091005 | 2.56E-05   |
| PolyphenPossibly:CategoryHomozygous                 | -0.8423817 | 0.04948171 | -17.024101 | 5.44E-65   |
| PolyphenProbably:CategoryHomozygous                 | -1.1848462 | 0.04958739 | -23.894102 | 3.53E-126  |
| PolyphenUnknown:CategoryHomozygous                  | -0.3645623 | 0.07380695 | -4.9394042 | 7.84E-07   |
| AncestryEUR:PolyphenPossibly                        | 0.01331302 | 0.03438272 | 0.38720085 | 0.69860752 |
| AncestryEUR/AFR:PolyphenPossibly                    | -0.0217267 | 0.04208907 | -0.5162074 | 0.60570959 |
| AncestryEUR/NAT:PolyphenPossibly                    | -0.0301259 | 0.04407832 | -0.6834627 | 0.49431454 |
| AncestryNAT:PolyphenPossibly                        | 0.03255912 | 0.109279   | 0.29794494 | 0.76574519 |
| AncestryNAT/AFR:PolyphenPossibly                    | -0.0970103 | 0.11343077 | -0.8552382 | 0.3924193  |
| AncestryUNKNOWN:PolyphenPossibly                    | 0.00934939 | 0.04069459 | 0.22974537 | 0.81828964 |
| AncestryEUR:PolyphenProbably                        | -0.0548865 | 0.03121222 | -1.7584955 | 0.07866323 |
| AncestryEUR/AFR:PolyphenProbably                    | -0.0267841 | 0.03770509 | -0.7103578 | 0.47748227 |
| AncestryEUR/NAT:PolyphenProbably                    | -0.0804027 | 0.03999555 | -2.0102902 | 0.04440049 |
| AncestryNAT:PolyphenProbably                        | -0.0673293 | 0.10163748 | -0.6624455 | 0.50768578 |
| AncestryNAT/AFR:PolyphenProbably                    | -0.2801294 | 0.10890095 | -2.572332  | 0.0101016  |
| AncestryUNKNOWN:PolyphenProbably                    | -0.0682185 | 0.03717405 | -1.8351116 | 0.06648916 |
| AncestryEUR:PolyphenUnknown                         | -0.0315017 | 0.05986622 | -0.5262013 | 0.59874834 |
| AncestryEUR/AFR:PolyphenUnknown                     | -0.0348042 | 0.07287297 | -0.4776007 | 0.63293443 |
| AncestryEUR/NAT:PolyphenUnknown                     | -0.0708143 | 0.07707059 | -0.9188239 | 0.35818771 |
| AncestryNAT:PolyphenUnknown                         | 0.07712826 | 0.18422808 | 0.41865637 | 0.67546729 |
| AncestryNAT/AFR:PolyphenUnknown                     | -0.3143636 | 0.21692661 | -1.4491705 | 0.14728998 |
| AncestryUNKNOWN:PolyphenUnknown                     | -0.1274034 | 0.07318181 | -1.7409167 | 0.08169818 |
| AncestryEUR:CategoryHomozygous                      | 0.1438969  | 0.02194561 | 6.55697752 | 5.49E-11   |
| AncestryEUR/AFR:CategoryHomozygous                  | -0.1922931 | 0.02835919 | -6.7806271 | 1.20E-11   |
| AncestryEUR/NAT:CategoryHomozygous                  | -0.008894  | 0.02846645 | -0.3124365 | 0.75470881 |
| AncestryNAT:CategoryHomozygous                      | 0.802063   | 0.0593681  | 13.5100001 | 1.37E-41   |
| AncestryNAT/AFR:CategoryHomozygous                  | -0.2393428 | 0.07630532 | -3.1366466 | 0.00170892 |
| AncestryUNKNOWN:CategoryHomozygous                  | 0.01152875 | 0.02647133 | 0.43551846 | 0.66318614 |
| AncestryEUR:PolyphenPossibly:CategoryHomozygous     | 0.1444687  | 0.06755644 | 2.13848903 | 0.03247707 |
| AncestryEUR/AFR:PolyphenPossibly:CategoryHomozygous | -0.026642  | 0.09229069 | -0.2886747 | 0.77283032 |
| AncestryEUR/NAT:PolyphenPossibly:CategoryHomozygous | 0.06756771 | 0.08983601 | 0.75212281 | 0.45197721 |
| AncestryNAT:PolyphenPossibly:CategoryHomozygous     | 0.22435544 | 0.16540698 | 1.35638434 | 0.17497691 |
| AncestryNAT/AFR:PolyphenPossibly:CategoryHomozygous | 0.04917538 | 0.25278356 | 0.19453551 | 0.84575659 |
| AncestryUNKNOWN:PolyphenPossibly:CategoryHomozygous | 0.15479838 | 0.08101283 | 1.91078832 | 0.05603179 |
| AncestryEUR:PolyphenProbably:CategoryHomozygous     | 0.34222006 | 0.06634077 | 5.15851799 | 2.49E-07   |
| AncestryEUR/AFR:PolyphenProbably:CategoryHomozygous | 0.0207498  | 0.09174757 | 0.22616181 | 0.82107557 |
| AncestryEUR/NAT:PolyphenProbably:CategoryHomozygous | 0.38540357 | 0.0845628  | 4.55760152 | 5.17E-06   |
| AncestryNAT:PolyphenProbably:CategoryHomozygous     | 0.67860582 | 0.1511677  | 4.48909267 | 7.15E-06   |
| AncestryNAT/AFR:PolyphenProbably:CategoryHomozygous | 0.38903916 | 0.24337063 | 1.59854608 | 0.1099215  |
| AncestryUNKNOWN:PolyphenProbably:CategoryHomozygous | 0.20071041 | 0.08190015 | 2.45067201 | 0.01425898 |
| AncestryEUR:PolyphenUnknown:CategoryHomozygous      | 0.28834492 | 0.10024863 | 2.87629787 | 0.0040237  |
| AncestryEUR/AFR:PolyphenUnknown:CategoryHomozygous  | 0.17725189 | 0.13104957 | 1.35255604 | 0.1761975  |
| AncestryEUR/NAT:PolyphenUnknown:CategoryHomozygous  | 0.17956196 | 0.13269137 | 1.35323014 | 0.17598212 |
| AncestryNAT:PolyphenUnknown:CategoryHomozygous      | 0.31341091 | 0.24749679 | 1.2663231  | 0.20539743 |
| AncestryNAT/AFR:PolyphenUnknown:CategoryHomozygous  | 0.47411695 | 0.36253094 | 1.30779723 | 0.19094209 |
| AncestryUNKNOWN:PolyphenUnknown:CategoryHomozygous  | 0.36193836 | 0.1213482  | 2.98264293 | 0.00285771 |

**Table S7. Model Coefficients for Individual Sample Analysis by Deconvolved Ancestry with Population of Origin Effect on Heterozygosity**

| <b>Coefficients</b>                  | <b>Estimate</b> | <b>Std Error</b> | <b>z value</b> | <b>Pr(&gt;  z )</b> |
|--------------------------------------|-----------------|------------------|----------------|---------------------|
| (Intercept)                          | 8.18638085      | 0.045094         | 181.540365     | 0                   |
| IndividualHG00732PUR                 | -24.58406       | 1425.49168       | -0.017246      | 0.98624035          |
| IndividualNA19648MXL                 | -24.63264       | 1433.91598       | -0.0171786     | 0.98629415          |
| IndividualNA19649MXL                 | -24.63264       | 1433.91599       | -0.0171786     | 0.98629415          |
| IndividualNA19669MXL                 | -24.63264       | 1433.91592       | -0.0171786     | 0.98629415          |
| IndividualNA19670MXL                 | -5.0889783      | 0.14179261       | -35.890294     | 4.33E-282           |
| IndividualNA19700ASW                 | -0.3150464      | 0.04633154       | -6.7998251     | 1.05E-11            |
| IndividualNA19701ASW                 | -0.3862036      | 0.04646371       | -8.3119393     | 9.42E-17            |
| IndividualNA19703ASW                 | -0.249552       | 0.04621762       | -5.3994999     | 6.68E-08            |
| IndividualNA19704ASW                 | -0.3066005      | 0.04260748       | -7.1959312     | 6.20E-13            |
| AncestryEUR                          | -0.4171519      | 0.04734942       | -8.8100742     | 1.25E-18            |
| AncestryEUR/AFR                      | -3.4873058      | 0.07850871       | -44.41935      | 0                   |
| AncestryEUR/NAT                      | -2.2885241      | 0.05802467       | -39.440538     | 0                   |
| AncestryNAT                          | -6.3161543      | 0.22577181       | -27.975832     | 3.20E-172           |
| AncestryNAT/AFR                      | -6.337914       | 0.28254622       | -22.431424     | 1.94E-111           |
| AncestryUNKNOWN                      | -1.7547148      | 0.0368924        | -47.563038     | 0                   |
| CategoryHomozygous                   | -0.4412717      | 0.01557679       | -28.328792     | 1.53E-176           |
| PolyphenPossibly                     | -1.6171629      | 0.02395205       | -67.516675     | 0                   |
| PolyphenProbably                     | -1.3444317      | 0.02143442       | -62.723027     | 0                   |
| PolyphenUnknown                      | -2.8286636      | 0.04126403       | -68.550353     | 0                   |
| IndividualHG00732PUR:AncestryEUR     | 24.3752386      | 1425.49168       | 0.01709953     | 0.98635721          |
| IndividualNA19648MXL:AncestryEUR     | 24.5783957      | 1433.91598       | 0.01714075     | 0.98632433          |
| IndividualNA19649MXL:AncestryEUR     | 24.1119748      | 1433.91599       | 0.01681547     | 0.98658383          |
| IndividualNA19669MXL:AncestryEUR     | 23.8802107      | 1433.91592       | 0.01665384     | 0.98671277          |
| IndividualNA19670MXL:AncestryEUR     | 3.57703344      | 0.14490305       | 24.6857015     | 1.52E-134           |
| IndividualNA19700ASW:AncestryEUR     | -2.9560449      | 0.08403011       | -35.178401     | 4.28E-271           |
| IndividualNA19701ASW:AncestryEUR     | -3.9642687      | 0.1284705        | -30.857423     | 4.45E-209           |
| IndividualNA19703ASW:AncestryEUR     | -3.3387801      | 0.09414252       | -35.465166     | 1.69E-275           |
| IndividualNA19704ASW:AncestryEUR     | -3.4171696      | 0.09751443       | -35.042706     | 5.04E-269           |
| IndividualHG00732PUR:AncestryEUR/AFR | 25.6990657      | 1425.49168       | 0.01802821     | 0.98561635          |
| IndividualNA19648MXL:AncestryEUR/AFR | 24.0021134      | 1433.91599       | 0.01673886     | 0.98664495          |
| IndividualNA19649MXL:AncestryEUR/AFR | 25.0061669      | 1433.91599       | 0.01743907     | 0.98608634          |
| IndividualNA19669MXL:AncestryEUR/AFR | 25.1007257      | 1433.91592       | 0.01750502     | 0.98603373          |
| IndividualNA19670MXL:AncestryEUR/AFR | 5.47346404      | 0.16402868       | 33.3689446     | 3.87E-244           |
| IndividualNA19700ASW:AncestryEUR/AFR | 2.65952117      | 0.08107896       | 32.8016173     | 5.58E-236           |
| IndividualNA19701ASW:AncestryEUR/AFR | 2.55491421      | 0.08163991       | 31.2949157     | 5.47E-215           |
| IndividualNA19703ASW:AncestryEUR/AFR | 2.36851619      | 0.08165335       | 29.006969      | 5.37E-185           |
| IndividualNA19704ASW:AncestryEUR/AFR | 2.62313937      | 0.07908371       | 33.1691489     | 3.00E-241           |
| IndividualHG00732PUR:AncestryEUR/NAT | 24.934908       | 1425.49168       | 0.01749215     | 0.986044            |
| IndividualNA19648MXL:AncestryEUR/NAT | 24.7452194      | 1433.91598       | 0.01725709     | 0.98623152          |
| IndividualNA19649MXL:AncestryEUR/NAT | 25.4817492      | 1433.91599       | 0.01777074     | 0.98582175          |
| IndividualNA19669MXL:AncestryEUR/NAT | 25.6843248      | 1433.91592       | 0.01791202     | 0.98570904          |
| IndividualNA19670MXL:AncestryEUR/NAT | 6.378238        | 0.14702119       | 43.3831192     | 0                   |
| IndividualNA19701ASW:AncestryEUR/NAT | -2.8053585      | 0.18581939       | -15.097233     | 1.69E-51            |
| IndividualNA19703ASW:AncestryEUR/NAT | -4.798308       | 0.45083926       | -10.643057     | 1.88E-26            |
| IndividualHG00732PUR:AncestryNAT     | 25.5648889      | 1425.4917        | 0.01793408     | 0.98569144          |
| IndividualNA19648MXL:AncestryNAT     | 23.7322284      | 1433.91604       | 0.01655064     | 0.9867951           |
| IndividualNA19649MXL:AncestryNAT     | 27.1769108      | 1433.916         | 0.01895293     | 0.98487865          |
| IndividualNA19669MXL:AncestryNAT     | 27.5364188      | 1433.91594       | 0.01920365     | 0.98467865          |
| IndividualNA19670MXL:AncestryNAT     | 8.8870245       | 0.26209605       | 33.9075099     | 5.16E-252           |
| IndividualHG00732PUR:AncestryNAT/AFR | 24.6581676      | 1425.49173       | 0.01729801     | 0.98619887          |
| IndividualNA19648MXL:AncestryNAT/AFR | 24.8093928      | 1433.91603       | 0.01730184     | 0.98619581          |
| IndividualNA19649MXL:AncestryNAT/AFR | 25.5333115      | 1433.91602       | 0.0178067      | 0.98579306          |
| IndividualNA19669MXL:AncestryNAT/AFR | 26.3806095      | 1433.91595       | 0.0183976      | 0.98532167          |
| IndividualNA19670MXL:AncestryNAT/AFR | 8.41472043      | 0.31568224       | 26.6556663     | 1.54E-156           |
| IndividualNA19700ASW:AncestryNAT/AFR | -2.2142171      | 1.03872843       | -2.1316612     | 0.03303471          |
| IndividualNA19701ASW:AncestryNAT/AFR | 4.03902501      | 0.2846667        | 14.1886106     | 1.08E-45            |
| IndividualNA19703ASW:AncestryNAT/AFR | 1.33120649      | 0.3255353        | 4.08928455     | 4.33E-05            |

|                                                     |            |            |            |            |
|-----------------------------------------------------|------------|------------|------------|------------|
| IndividualNA19704ASW:AncestryNAT/AFR                | 1.41492321 | 0.32394649 | 4.36776834 | 1.26E-05   |
| IndividualHG00732PUR:AncestryUNKNOWN                | 24.7303434 | 1425.49168 | 0.01734864 | 0.98615848 |
| IndividualNA19648MXL:AncestryUNKNOWN                | 24.4027    | 1433.91598 | 0.01701822 | 0.98642208 |
| IndividualNA19649MXL:AncestryUNKNOWN                | 24.7810192 | 1433.91599 | 0.01728206 | 0.9862116  |
| IndividualNA19669MXL:AncestryUNKNOWN                | 24.8907031 | 1433.91592 | 0.01735855 | 0.98615058 |
| IndividualNA19670MXL:AncestryUNKNOWN                | 5.24028044 | 0.14117296 | 37.1195758 | 1.36E-301  |
| IndividualNA19700ASW:AncestryUNKNOWN                | -0.3690557 | 0.05270311 | -7.0025413 | 2.51E-12   |
| IndividualNA19701ASW:AncestryUNKNOWN                | -0.3701103 | 0.05383834 | -6.8744754 | 6.22E-12   |
| IndividualNA19703ASW:AncestryUNKNOWN                | -0.2093766 | 0.04974379 | -4.2091005 | 2.56E-05   |
| CategoryHomozygous:populationMXL                    | 0.21908711 | 0.03076327 | 7.12171004 | 1.07E-12   |
| CategoryHomozygous:populationPUR                    | 0.12157065 | 0.03278784 | 3.70779659 | 0.00020907 |
| CategoryHomozygous:PolyphenPossibly                 | -0.8423817 | 0.04948171 | -17.024101 | 5.44E-65   |
| CategoryHomozygous:PolyphenProbably                 | -1.1848462 | 0.04958739 | -23.894102 | 3.53E-126  |
| CategoryHomozygous:PolyphenUnknown                  | -0.3645623 | 0.07380695 | -4.9394042 | 7.84E-07   |
| AncestryEUR:PolyphenPossibly                        | 0.01331302 | 0.03438272 | 0.38720085 | 0.69860752 |
| AncestryEUR/AFR:PolyphenPossibly                    | -0.0217267 | 0.04208907 | -0.5162074 | 0.60570959 |
| AncestryEUR/NAT:PolyphenPossibly                    | -0.0301259 | 0.04407832 | -0.6834627 | 0.49431454 |
| AncestryNAT:PolyphenPossibly                        | 0.03255912 | 0.109279   | 0.29794494 | 0.76574519 |
| AncestryNAT/AFR:PolyphenPossibly                    | -0.0970103 | 0.11343077 | -0.8552382 | 0.3924193  |
| AncestryUNKNOWN:PolyphenPossibly                    | 0.00934939 | 0.04069459 | 0.22974537 | 0.81828964 |
| AncestryEUR:PolyphenProbably                        | -0.0548865 | 0.0312122  | -1.7584955 | 0.07866323 |
| AncestryEUR/AFR:PolyphenProbably                    | -0.0267841 | 0.03770509 | -0.7103578 | 0.47748227 |
| AncestryEUR/NAT:PolyphenProbably                    | -0.0804027 | 0.03999555 | -2.0102902 | 0.04440049 |
| AncestryNAT:PolyphenProbably                        | -0.0673293 | 0.10163748 | -0.6624455 | 0.50768578 |
| AncestryNAT/AFR:PolyphenProbably                    | -0.2801294 | 0.10890095 | -2.572332  | 0.0101016  |
| AncestryUNKNOWN:PolyphenProbably                    | -0.0682185 | 0.03717405 | -1.8351116 | 0.06648916 |
| AncestryEUR:PolyphenUnknown                         | -0.0315017 | 0.05986622 | -0.5262013 | 0.59874834 |
| AncestryEUR/AFR:PolyphenUnknown                     | -0.0348042 | 0.07287297 | -0.4776007 | 0.63293443 |
| AncestryEUR/NAT:PolyphenUnknown                     | -0.0708143 | 0.07707059 | -0.9188239 | 0.35818771 |
| AncestryNAT:PolyphenUnknown                         | 0.07712826 | 0.18422808 | 0.41865637 | 0.67546729 |
| AncestryNAT/AFR:PolyphenUnknown                     | -0.3143636 | 0.21692661 | -1.4491705 | 0.14728998 |
| AncestryUNKNOWN:PolyphenUnknown                     | -0.1274034 | 0.07318181 | -1.7409167 | 0.08169818 |
| AncestryEUR:CategoryHomozygous                      | -0.0281547 | 0.03654461 | -0.77042   | 0.44105081 |
| AncestryEUR/AFR:CategoryHomozygous                  | -0.2287565 | 0.02907114 | -7.8688526 | 3.58E-15   |
| AncestryEUR/NAT:CategoryHomozygous                  | -0.2084227 | 0.04130079 | -5.0464577 | 4.50E-07   |
| AncestryNAT:CategoryHomozygous                      | 0.58777659 | 0.06674072 | 8.80686621 | 1.29E-18   |
| AncestryNAT/AFR:CategoryHomozygous                  | -0.3448123 | 0.07790512 | -4.4260548 | 9.60E-06   |
| AncestryUNKNOWN:CategoryHomozygous                  | -0.12995   | 0.03486443 | -3.7272956 | 0.00019355 |
| AncestryEUR:CategoryHomozygous:PolyphenPossibly     | 0.1444687  | 0.06755644 | 2.13848903 | 0.03247707 |
| AncestryEUR/AFR:CategoryHomozygous:PolyphenPossibly | -0.026642  | 0.09229069 | -0.2886747 | 0.77283032 |
| AncestryEUR/NAT:CategoryHomozygous:PolyphenPossibly | 0.06756771 | 0.08983601 | 0.75212281 | 0.45197721 |
| AncestryNAT:CategoryHomozygous:PolyphenPossibly     | 0.22435544 | 0.16540698 | 1.35638434 | 0.17497691 |
| AncestryNAT/AFR:CategoryHomozygous:PolyphenPossibly | 0.04917538 | 0.25278356 | 0.19453551 | 0.84575659 |
| AncestryUNKNOWN:CategoryHomozygous:PolyphenPossibly | 0.15479838 | 0.08101283 | 1.91078832 | 0.05603179 |
| AncestryEUR:CategoryHomozygous:PolyphenProbably     | 0.34222006 | 0.06634077 | 5.15851799 | 2.49E-07   |
| AncestryEUR/AFR:CategoryHomozygous:PolyphenProbably | 0.0207498  | 0.09174757 | 0.22616181 | 0.82107557 |
| AncestryEUR/NAT:CategoryHomozygous:PolyphenProbably | 0.38540357 | 0.0845628  | 4.55760152 | 5.17E-06   |
| AncestryNAT:CategoryHomozygous:PolyphenProbably     | 0.67860582 | 0.1511677  | 4.48909267 | 7.15E-06   |
| AncestryNAT/AFR:CategoryHomozygous:PolyphenProbably | 0.38903916 | 0.24337063 | 1.59854608 | 0.1099215  |
| AncestryUNKNOWN:CategoryHomozygous:PolyphenProbably | 0.20071041 | 0.08190015 | 2.45067201 | 0.01425898 |
| AncestryEUR:CategoryHomozygous:PolyphenUnknown      | 0.28834492 | 0.10024863 | 2.87629787 | 0.0040237  |
| AncestryEUR/AFR:CategoryHomozygous:PolyphenUnknown  | 0.17725189 | 0.13104957 | 1.35255604 | 0.1761975  |
| AncestryEUR/NAT:CategoryHomozygous:PolyphenUnknown  | 0.17956196 | 0.13269137 | 1.35323014 | 0.17598212 |
| AncestryNAT:CategoryHomozygous:PolyphenUnknown      | 0.31341091 | 0.24749679 | 1.2663231  | 0.20539743 |
| AncestryNAT/AFR:CategoryHomozygous:PolyphenUnknown  | 0.47411695 | 0.36253094 | 1.30779723 | 0.19094209 |
| AncestryUNKNOWN:CategoryHomozygous:PolyphenUnknown  | 0.36193836 | 0.1213482  | 2.98264293 | 0.00285771 |

**Table S8. Model Coefficients for Individual Sample Analysis by Deconvolved Ancestry with Individual Level Terms for Population of Origin Effect on Heterozygosity**

| <b>Coefficients</b>                  | <b>Estimate</b> | <b>Std Error</b> | <b>z value</b> | <b>Pr(&gt; z )</b> |
|--------------------------------------|-----------------|------------------|----------------|--------------------|
| (Intercept)                          | 8.1973221       | 0.04547019       | 180.279049     | 0                  |
| IndividualHG00732PUR                 | -24.606778      | 1427.74523       | -0.0172347     | 0.98624937         |
| IndividualNA19648MXL                 | -24.635852      | 1432.78439       | -0.0171944     | 0.98628154         |
| IndividualNA19649MXL                 | -24.649728      | 1435.00045       | -0.0171775     | 0.98629501         |
| IndividualNA19669MXL                 | -24.646887      | 1434.41872       | -0.0171825     | 0.98629103         |
| IndividualNA19670MXL                 | -5.0939131      | 0.14217526       | -35.828407     | 3.99E-281          |
| IndividualNA19700ASW                 | -0.3261112      | 0.04717485       | -6.9128201     | 4.75E-12           |
| IndividualNA19701ASW                 | -0.4015771      | 0.04734311       | -8.4822705     | 2.21E-17           |
| IndividualNA19703ASW                 | -0.2644298      | 0.04706581       | -5.6182999     | 1.93E-08           |
| IndividualNA19704ASW                 | -0.3092605      | 0.04340144       | -7.1255806     | 1.04E-12           |
| AncestryEUR                          | -0.4185421      | 0.04733977       | -8.8412379     | 9.47E-19           |
| AncestryEUR/AFR                      | -3.4885805      | 0.07849577       | -44.442909     | 0                  |
| AncestryEUR/NAT                      | -2.2900728      | 0.05798576       | -39.493713     | 0                  |
| AncestryNAT                          | -6.3134885      | 0.2258131        | -27.958912     | 5.14E-172          |
| AncestryNAT/AFR                      | -6.3395088      | 0.28253111       | -22.438268     | 1.67E-111          |
| AncestryUNKNOWN                      | -1.7557371      | 0.03685254       | -47.642235     | 0                  |
| CategoryHomozygous                   | -0.3503891      | 0.04059954       | -8.6303722     | 6.12E-18           |
| PolyphenPossibly                     | -1.6171629      | 0.02395205       | -67.516675     | 0                  |
| PolyphenProbably                     | -1.3444317      | 0.02143442       | -62.723027     | 0                  |
| PolyphenUnknown                      | -2.8286636      | 0.04126403       | -68.550353     | 0                  |
| IndividualHG00732PUR:AncestryEUR     | 24.3778616      | 1427.74523       | 0.01707438     | 0.98637728         |
| IndividualNA19648MXL:AncestryEUR     | 24.5764329      | 1432.78439       | 0.01715292     | 0.98631462         |
| IndividualNA19649MXL:AncestryEUR     | 24.1129153      | 1435.00045       | 0.01680342     | 0.98659344         |
| IndividualNA19669MXL:AncestryEUR     | 23.8803752      | 1434.41872       | 0.01664812     | 0.98671734         |
| IndividualNA19670MXL:AncestryEUR     | 3.57664718      | 0.14490551       | 24.6826175     | 1.64E-134          |
| IndividualNA19700ASW:AncestryEUR     | -2.9562956      | 0.08403277       | -35.18027      | 4.01E-271          |
| IndividualNA19701ASW:AncestryEUR     | -3.9646005      | 0.12847272       | -30.859473     | 4.18E-209          |
| IndividualNA19703ASW:AncestryEUR     | -3.3391027      | 0.09414547       | -35.467482     | 1.56E-275          |
| IndividualNA19704ASW:AncestryEUR     | -3.417261       | 0.09751631       | -35.042968     | 4.99E-269          |
| IndividualHG00732PUR:AncestryEUR/AFR | 25.7046979      | 1427.74524       | 0.0180037      | 0.9856359          |
| IndividualNA19648MXL:AncestryEUR/AFR | 24.0010563      | 1432.78439       | 0.01675134     | 0.98663499         |
| IndividualNA19649MXL:AncestryEUR/AFR | 25.009604       | 1435.00045       | 0.01742829     | 0.98609494         |
| IndividualNA19669MXL:AncestryEUR/AFR | 25.1030884      | 1434.41872       | 0.01750053     | 0.98603731         |
| IndividualNA19670MXL:AncestryEUR/AFR | 5.47400481      | 0.16403335       | 33.3712913     | 3.58E-244          |
| IndividualNA19700ASW:AncestryEUR/AFR | 2.66085519      | 0.08108654       | 32.8150045     | 3.60E-236          |
| IndividualNA19701ASW:AncestryEUR/AFR | 2.5568471       | 0.08164778       | 31.3155744     | 2.86E-215          |
| IndividualNA19703ASW:AncestryEUR/AFR | 2.37038029      | 0.08166087       | 29.0271267     | 2.99E-185          |
| IndividualNA19704ASW:AncestryEUR/AFR | 2.62329875      | 0.07908698       | 33.1697914     | 2.94E-241          |
| IndividualHG00732PUR:AncestryEUR/NAT | 24.9398078      | 1427.74523       | 0.01746797     | 0.98606329         |
| IndividualNA19648MXL:AncestryEUR/NAT | 24.7439247      | 1432.78439       | 0.01726982     | 0.98622136         |
| IndividualNA19649MXL:AncestryEUR/NAT | 25.4845599      | 1435.00045       | 0.01775927     | 0.9858309          |
| IndividualNA19669MXL:AncestryEUR/NAT | 25.6861341      | 1434.41872       | 0.017907       | 0.98571305         |
| IndividualNA19670MXL:AncestryEUR/NAT | 6.37853596      | 0.1470249        | 43.3840522     | 0                  |
| IndividualNA19701ASW:AncestryEUR/NAT | -2.8039542      | 0.18582036       | -15.089597     | 1.90E-51           |
| IndividualNA19703ASW:AncestryEUR/NAT | -4.7969536      | 0.45083963       | -10.640044     | 1.94E-26           |
| IndividualHG00732PUR:AncestryNAT     | 25.5587967      | 1427.74526       | 0.01790151     | 0.98571742         |
| IndividualNA19648MXL:AncestryNAT     | 23.7278933      | 1432.78444       | 0.01656069     | 0.98678709         |
| IndividualNA19649MXL:AncestryNAT     | 27.1709702      | 1435.00047       | 0.01893447     | 0.98489338         |
| IndividualNA19669MXL:AncestryNAT     | 27.5305458      | 1434.41874       | 0.01919282     | 0.98468728         |
| IndividualNA19670MXL:AncestryNAT     | 8.88420532      | 0.26214347       | 33.8906225     | 9.16E-252          |
| IndividualHG00732PUR:AncestryNAT/AFR | 24.6643718      | 1427.74529       | 0.01727505     | 0.98621719         |
| IndividualNA19648MXL:AncestryNAT/AFR | 24.8084854      | 1432.78444       | 0.01731488     | 0.98618542         |
| IndividualNA19649MXL:AncestryNAT/AFR | 25.5372026      | 1435.00049       | 0.01779595     | 0.98580163         |
| IndividualNA19669MXL:AncestryNAT/AFR | 26.3833692      | 1434.41875       | 0.01839307     | 0.98532528         |
| IndividualNA19670MXL:AncestryNAT/AFR | 8.4154149       | 0.31568779       | 26.6573974     | 1.47E-156          |
| IndividualNA19700ASW:AncestryNAT/AFR | -2.2125564      | 1.03872884       | -2.1300616     | 0.03316652         |
| IndividualNA19701ASW:AncestryNAT/AFR | 4.04141286      | 0.28466682       | 14.196993      | 9.56E-46           |
| IndividualNA19703ASW:AncestryNAT/AFR | 1.3335108       | 0.32553592       | 4.09635533     | 4.20E-05           |



|                                                     |            |            |            |            |
|-----------------------------------------------------|------------|------------|------------|------------|
| IndividualNA19704ASW:AncestryNAT/AFR                | 1.41515777 | 0.3239478  | 4.36847476 | 1.25E-05   |
| IndividualHG00732PUR:AncestryUNKNOWN                | 24.7343488 | 1427.74523 | 0.01732406 | 0.98617809 |
| IndividualNA19648MXL:AncestryUNKNOWN                | 24.4011725 | 1432.78439 | 0.0170306  | 0.98641221 |
| IndividualNA19649MXL:AncestryUNKNOWN                | 24.7831236 | 1435.00045 | 0.01727046 | 0.98622085 |
| IndividualNA19669MXL:AncestryUNKNOWN                | 24.8918949 | 1434.41872 | 0.0173533  | 0.98615477 |
| IndividualNA19670MXL:AncestryUNKNOWN                | 5.24033924 | 0.14117442 | 37.1196084 | 1.36E-301  |
| IndividualNA19700ASW:AncestryUNKNOWN                | -0.3685999 | 0.05270641 | -6.9934546 | 2.68E-12   |
| IndividualNA19701ASW:AncestryUNKNOWN                | -0.3694222 | 0.05384206 | -6.8612206 | 6.83E-12   |
| IndividualNA19703ASW:AncestryUNKNOWN                | -0.2087152 | 0.04974759 | -4.1954832 | 2.72E-05   |
| IndividualHG00732PUR:CategoryHomozygous             | 0.05406411 | 0.03274214 | 1.65120864 | 0.09869598 |
| IndividualNA19648MXL:CategoryHomozygous             | 0.11231051 | 0.03281501 | 3.42253441 | 0.0006204  |
| IndividualNA19649MXL:CategoryHomozygous             | 0.14008135 | 0.03326995 | 4.21044692 | 2.55E-05   |
| IndividualNA19669MXL:CategoryHomozygous             | 0.13488807 | 0.03359879 | 4.01467059 | 5.95E-05   |
| IndividualNA19670MXL:CategoryHomozygous             | 0.1126836  | 0.03538804 | 3.18422813 | 0.00145141 |
| IndividualNA19700ASW:CategoryHomozygous             | -0.090517  | 0.04222823 | -2.1435193 | 0.03207142 |
| IndividualNA19701ASW:CategoryHomozygous             | -0.0778335 | 0.04250952 | -1.830966  | 0.06710561 |
| IndividualNA19703ASW:CategoryHomozygous             | -0.0792875 | 0.0421834  | -1.879589  | 0.06016412 |
| IndividualNA19704ASW:CategoryHomozygous             | -0.1155701 | 0.04183781 | -2.7623352 | 0.00573895 |
| CategoryHomozygous:PolyphenPossibly                 | -0.8423817 | 0.04948171 | -17.024101 | 5.44E-65   |
| CategoryHomozygous:PolyphenProbably                 | -1.1848462 | 0.04958739 | -23.894102 | 3.53E-126  |
| CategoryHomozygous:PolyphenUnknown                  | -0.3645623 | 0.07380695 | -4.9394042 | 7.84E-07   |
| AncestryEUR:PolyphenPossibly                        | 0.01331302 | 0.03438272 | 0.38720085 | 0.69860752 |
| AncestryEUR/AFR:PolyphenPossibly                    | -0.0217267 | 0.04208907 | -0.5162074 | 0.60570959 |
| AncestryEUR/NAT:PolyphenPossibly                    | -0.0301259 | 0.04407832 | -0.6834627 | 0.49431454 |
| AncestryNAT:PolyphenPossibly                        | 0.03255912 | 0.109279   | 0.29794494 | 0.76574519 |
| AncestryNAT/AFR:PolyphenPossibly                    | -0.0970103 | 0.11343077 | -0.8552382 | 0.3924193  |
| AncestryUNKNOWN:PolyphenPossibly                    | 0.00934939 | 0.04069459 | 0.22974537 | 0.81828964 |
| AncestryEUR:PolyphenProbably                        | -0.0548865 | 0.0312122  | -1.7584955 | 0.07866323 |
| AncestryEUR/AFR:PolyphenProbably                    | -0.0267841 | 0.03770509 | -0.7103578 | 0.47748227 |
| AncestryEUR/NAT:PolyphenProbably                    | -0.0804027 | 0.03999555 | -2.0102902 | 0.04440049 |
| AncestryNAT:PolyphenProbably                        | -0.0673293 | 0.10163748 | -0.6624455 | 0.50768578 |
| AncestryNAT/AFR:PolyphenProbably                    | -0.2801294 | 0.10890095 | -2.572332  | 0.0101016  |
| AncestryUNKNOWN:PolyphenProbably                    | -0.0682185 | 0.03717405 | -1.8351116 | 0.06648916 |
| AncestryEUR:PolyphenUnknown                         | -0.0315017 | 0.05986622 | -0.5262013 | 0.59874834 |
| AncestryEUR/AFR:PolyphenUnknown                     | -0.0348042 | 0.07287297 | -0.4776007 | 0.63293443 |
| AncestryEUR/NAT:PolyphenUnknown                     | -0.0708143 | 0.07707059 | -0.9188239 | 0.35818771 |
| AncestryNAT:PolyphenUnknown                         | 0.07712826 | 0.18422808 | 0.41865637 | 0.67546729 |
| AncestryNAT/AFR:PolyphenUnknown                     | -0.3143636 | 0.21692661 | -1.4491705 | 0.14728998 |
| AncestryUNKNOWN:PolyphenUnknown                     | -0.1274034 | 0.07318181 | -1.7409167 | 0.08169818 |
| AncestryEUR:CategoryHomozygous                      | -0.0233921 | 0.03696362 | -0.6328409 | 0.52683756 |
| AncestryEUR/AFR:CategoryHomozygous                  | -0.2289011 | 0.02909863 | -7.8663872 | 3.65E-15   |
| AncestryEUR/NAT:CategoryHomozygous                  | -0.2064777 | 0.04137734 | -4.990116  | 6.03E-07   |
| AncestryNAT:CategoryHomozygous                      | 0.59275986 | 0.06738907 | 8.79608297 | 1.42E-18   |
| AncestryNAT/AFR:CategoryHomozygous                  | -0.3449722 | 0.07861414 | -4.3881705 | 1.14E-05   |
| AncestryUNKNOWN:CategoryHomozygous                  | -0.1281572 | 0.03488536 | -3.6736668 | 0.00023909 |
| AncestryEUR:CategoryHomozygous:PolyphenPossibly     | 0.1444687  | 0.06755644 | 2.13848903 | 0.03247707 |
| AncestryEUR/AFR:CategoryHomozygous:PolyphenPossibly | -0.026642  | 0.09229069 | -0.2886747 | 0.77283032 |
| AncestryEUR/NAT:CategoryHomozygous:PolyphenPossibly | 0.06756771 | 0.08983601 | 0.75212281 | 0.45197721 |
| AncestryNAT:CategoryHomozygous:PolyphenPossibly     | 0.22435544 | 0.16540698 | 1.35638434 | 0.17497691 |
| AncestryNAT/AFR:CategoryHomozygous:PolyphenPossibly | 0.04917538 | 0.25278356 | 0.19453551 | 0.84575659 |
| AncestryUNKNOWN:CategoryHomozygous:PolyphenPossibly | 0.15479838 | 0.08101283 | 1.91078832 | 0.05603179 |
| AncestryEUR:CategoryHomozygous:PolyphenProbably     | 0.34222006 | 0.06634077 | 5.15851799 | 2.49E-07   |
| AncestryEUR/AFR:CategoryHomozygous:PolyphenProbably | 0.0207498  | 0.09174757 | 0.22616181 | 0.82107557 |
| AncestryEUR/NAT:CategoryHomozygous:PolyphenProbably | 0.38540357 | 0.0845628  | 4.55760152 | 5.17E-06   |
| AncestryNAT:CategoryHomozygous:PolyphenProbably     | 0.67860582 | 0.1511677  | 4.48909267 | 7.15E-06   |
| AncestryNAT/AFR:CategoryHomozygous:PolyphenProbably | 0.38903916 | 0.24337063 | 1.59854608 | 0.1099215  |
| AncestryUNKNOWN:CategoryHomozygous:PolyphenProbably | 0.20071041 | 0.08190015 | 2.45067201 | 0.01425898 |
| AncestryEUR:CategoryHomozygous:PolyphenUnknown      | 0.28834492 | 0.10024863 | 2.87629787 | 0.0040237  |
| AncestryEUR/AFR:CategoryHomozygous:PolyphenUnknown  | 0.17725189 | 0.13104957 | 1.35255604 | 0.1761975  |
| AncestryEUR/NAT:CategoryHomozygous:PolyphenUnknown  | 0.17956196 | 0.13269137 | 1.35323014 | 0.17598212 |
| AncestryNAT:CategoryHomozygous:PolyphenUnknown      | 0.31341091 | 0.24749679 | 1.2663231  | 0.20539743 |
| AncestryNAT/AFR:CategoryHomozygous:PolyphenUnknown  | 0.47411695 | 0.36253094 | 1.30779723 | 0.19094209 |
| AncestryUNKNOWN:CategoryHomozygous:PolyphenUnknown  | 0.36193836 | 0.1213482  | 2.98264293 | 0.00285771 |

## Appendix SA: Assessment of PCAdmix Assignment Accuracy

We assessed the accuracy of ancestral assignments from PCAdmix using a simulation strategy to construct synthetic admixed genomes. These genomes were then analyzed using the PCAdmix ancestry deconvolution pipeline. To create simulated admixed samples, we first simulated ancestry tracks following a forward-time Markovian process. To assess performance over a range of ancestry proportions, we simulated tracks for an African-American like population (having 80% African, 19.5% European, and 0.5% Native American ancestry) and a Mexican-like population (having 1% African, 39% European, and 60% Native American ancestry). We created simulations for both sets for 8 generations and 15 generations of admixture.

A key aspect of PCAdmix inference is the use of phased haplotypes. For our simulations, we employed a leave-one-out strategy. For each simulated admixed individual, we randomly selected one of the 20 samples from each population in the reference panel to serve as a donor. Appropriate haplotypes were then copied from the three donors to create the simulated admixed sample. Local ancestry was then inferred for this synthetic sample using the remaining 19 individuals from each population in the reference panel (Figure 1). This procedure was repeated to analyze 40 simulated individuals for each analysis. In each case, assignment was determined in 100-SNP windows using a posterior probability threshold of 0.9, the same settings as used in other analyses.

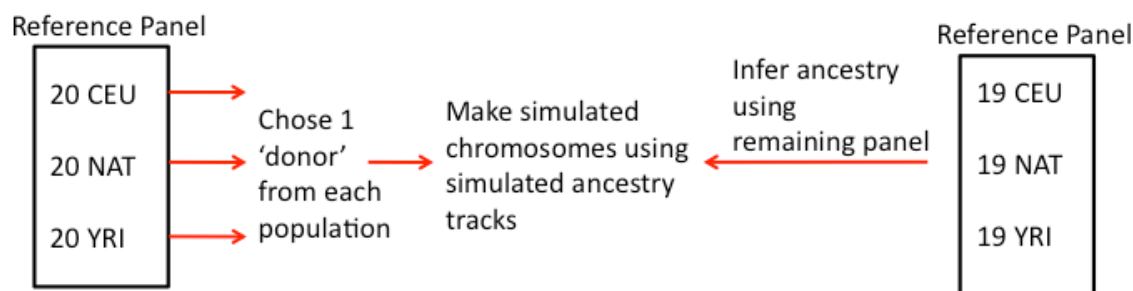

**Figure SA1. Strategy for Performing Inference on Simulated Individuals**

We find a high degree of concordance with the simulated results (Tables 1 and 2). For example, in the 8-generation ASW simulation, 90.4% of the genome that is truly European in origin is correctly assigned, conversely 96.3% of the genome assigned as European is actually European in origin (Table 4).

**Table SA1. Inference Accuracy for 40 Samples Simulated after 8 Generations of Admixture**

| ASW             |                 | Assigned Population |       |       |              | ASW                 |                 | True Population |       |       |
|-----------------|-----------------|---------------------|-------|-------|--------------|---------------------|-----------------|-----------------|-------|-------|
| True Population | Total bp        | CEU                 | NAT   | YRI   | Not Assigned | Assigned Population | Total bp        | CEU             | NAT   | YRI   |
| CEU             | 35,320,899,051  | 90.4%               | 0.3%  | 2.5%  | 6.8%         | CEU                 | 33,181,472,876  | 96.3%           | 0.1%  | 3.6%  |
| NAT             | 1,504,944,467   | 2.5%                | 88.5% | 2.5%  | 6.5%         | NAT                 | 1,482,485,313   | 7.6%            | 89.8% | 2.6%  |
| YRI             | 177,678,675,282 | 0.7%                | 0.0%  | 96.9% | 2.4%         | YRI                 | 173,056,365,661 | 0.5%            | 0.0%  | 99.5% |
|                 |                 |                     |       |       |              | Not Assigned        | 6,784,194,950   | 35.2%           | 1.4%  | 63.4% |

  

| MXL             |                 | Assigned Population |       |       |              | MXL                 |                 | True Population |       |       |
|-----------------|-----------------|---------------------|-------|-------|--------------|---------------------|-----------------|-----------------|-------|-------|
| True Population | Total bp        | CEU                 | NAT   | YRI   | Not Assigned | Assigned Population | Total bp        | CEU             | NAT   | YRI   |
| CEU             | 82,599,113,564  | 87.4%               | 2.2%  | 0.3%  | 10.1%        | CEU                 | 77,928,323,756  | 92.7%           | 7.3%  | 0.0%  |
| NAT             | 130,102,951,424 | 4.4%                | 88.7% | 0.3%  | 6.7%         | NAT                 | 117,301,794,596 | 1.6%            | 98.4% | 0.0%  |
| YRI             | 1,687,823,717   | 1.4%                | 1.0%  | 92.0% | 5.6%         | YRI                 | 2,128,568,338   | 11.7%           | 15.4% | 72.9% |
|                 |                 |                     |       |       |              | Not Assigned        | 17,145,832,110  | 48.7%           | 50.7% | 0.6%  |

**Table SA2. Inference Accuracy for 40 Samples Simulated after 15 Generations of Admixture**

| ASW Assigned Population |                 |       |       |       |              | ASW True Population |                 |       |       |       |
|-------------------------|-----------------|-------|-------|-------|--------------|---------------------|-----------------|-------|-------|-------|
| True Population         | Total bp        | CEU   | NAT   | YRI   | Not Assigned | Assigned Population | Total bp        | CEU   | NAT   | YRI   |
| CEU                     | 44,135,452,993  | 85.7% | 0.3%  | 4.1%  | 9.9%         | CEU                 | 39,816,473,708  | 95.0% | 0.2%  | 4.8%  |
| NAT                     | 1,404,590,563   | 5.1%  | 75.8% | 4.5%  | 14.6%        | NAT                 | 1,271,986,808   | 11.5% | 83.6% | 4.8%  |
| YRI                     | 168,964,475,244 | 1.1%  | 0.0%  | 95.2% | 3.7%         | YRI                 | 162,644,740,098 | 1.1%  | 0.0%  | 98.8% |
|                         |                 |       |       |       |              | Not Assigned        | 10,771,318,186  | 40.4% | 1.9%  | 57.6% |

  

| MXL Assigned Population |                 |       |       |       |              | MXL True Population |                 |       |       |       |
|-------------------------|-----------------|-------|-------|-------|--------------|---------------------|-----------------|-------|-------|-------|
| True Population         | Total bp        | CEU   | NAT   | YRI   | Not Assigned | Assigned Population | Total bp        | CEU   | NAT   | YRI   |
| CEU                     | 81,753,814,956  | 81.2% | 3.6%  | 0.3%  | 14.9%        | CEU                 | 72,254,477,759  | 91.8% | 8.0%  | 0.1%  |
| NAT                     | 129,708,890,382 | 4.5%  | 85.3% | 0.2%  | 10.0%        | NAT                 | 113,701,958,954 | 2.6%  | 97.3% | 0.1%  |
| YRI                     | 3,041,813,462   | 2.4%  | 2.1%  | 86.9% | 8.6%         | YRI                 | 3,187,916,645   | 8.0%  | 9.0%  | 83.0% |
|                         |                 |       |       |       |              | Not Assigned        | 25,360,165,442  | 48.0% | 51.0% | 1.0%  |

To assess the effect of reference panel on population inference, we conducted an additional simulation using TSI and LWK to construct simulated genomes while performing inference using CEU and YRI (Figure 2). This results in a modest drop in assignment accuracy.

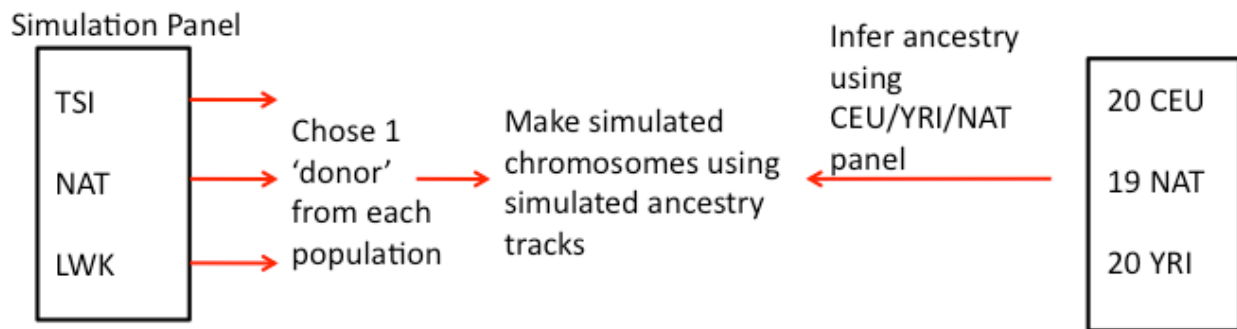

**Figure SA2. Inference Strategy Using TSI and LWK to Simulate Admixed Genomes**

**Table SA3. Inference Accuracy for 15 Generations with TSI or LWK**

| ASW Assigned Population |                 |       |       |       |              | ASW True Population |                 |       |       |       |
|-------------------------|-----------------|-------|-------|-------|--------------|---------------------|-----------------|-------|-------|-------|
| True Population         | Total bp        | CEU   | NAT   | YRI   | Not Assigned | Assigned Population | Total bp        | CEU   | NAT   | YRI   |
| CEU                     | 44,135,452,993  | 83.8% | 0.4%  | 4.2%  | 11.6%        | CEU                 | 40,954,186,490  | 90.4% | 0.2%  | 9.5%  |
| NAT                     | 1,404,590,563   | 4.8%  | 75.9% | 4.7%  | 14.6%        | NAT                 | 1,334,938,828   | 12.7% | 79.8% | 7.5%  |
| YRI                     | 168,964,475,244 | 2.3%  | 0.1%  | 91.1% | 6.5%         | YRI                 | 155,907,744,839 | 1.2%  | 0.0%  | 98.8% |
|                         |                 |       |       |       |              | Not Assigned        | 16,307,648,643  | 31.4% | 1.3%  | 67.4% |

  

| MXL Assigned Population |                 |       |       |       |              | MXL True Population |                 |       |       |       |
|-------------------------|-----------------|-------|-------|-------|--------------|---------------------|-----------------|-------|-------|-------|
| True Population         | Total bp        | CEU   | NAT   | YRI   | Not Assigned | Assigned Population | Total bp        | CEU   | NAT   | YRI   |
| CEU                     | 81,753,814,956  | 81.2% | 3.6%  | 0.3%  | 14.8%        | CEU                 | 72,019,115,361  | 92.2% | 7.7%  | 0.1%  |
| NAT                     | 129,708,890,382 | 4.3%  | 85.7% | 0.2%  | 9.8%         | NAT                 | 114,208,290,396 | 2.6%  | 97.3% | 0.1%  |
| YRI                     | 3,041,813,462   | 2.8%  | 2.4%  | 84.2% | 10.6%        | YRI                 | 3,084,716,027   | 9.2%  | 7.8%  | 83.1% |
|                         |                 |       |       |       |              | Not Assigned        | 25,192,397,016  | 48.0% | 50.7% | 1.3%  |

**Table SA4. Summary of Ancestry Assignment Accuracy**

|            | <b>8 Generations</b> |                                  | <b>15 Generations</b> |                                  | <b>15 Generations, TSI/LWK</b> |                                  |
|------------|----------------------|----------------------------------|-----------------------|----------------------------------|--------------------------------|----------------------------------|
|            | <b>Sensitivity</b>   | <b>Positive Predictive Value</b> | <b>Sensitivity</b>    | <b>Positive Predictive Value</b> | <b>Sensitivity</b>             | <b>Positive Predictive Value</b> |
| <b>ASW</b> |                      |                                  |                       |                                  |                                |                                  |
| CEU        | 90.4%                | 96.3%                            | 85.7%                 | 95.0%                            | 83.8%                          | 90.4%                            |
| NAT        | 88.5%                | 89.8%                            | 75.8%                 | 83.6%                            | 75.9%                          | 79.8%                            |
| YRI        | 96.9%                | 99.5%                            | 95.2%                 | 98.8%                            | 91.1%                          | 98.8%                            |
| <b>MXL</b> |                      |                                  |                       |                                  |                                |                                  |
| CEU        | 87.4%                | 92.7%                            | 81.2%                 | 91.8%                            | 81.2%                          | 92.2%                            |
| NAT        | 88.7%                | 98.4%                            | 85.3%                 | 97.3%                            | 85.7%                          | 97.3%                            |
| YRI        | 92.0%                | 72.9%                            | 86.9%                 | 83.0%                            | 84.2%                          | 83.1%                            |

This table represents a summary of the results represented in Tables 1-3.

As a final analysis, we performed local ancestry deconvolution on samples from the TSI and LWK populations, two groups without expected admixture from continentally distinct populations. We find that less than 2% of their genomes are assigned an incorrect continent of ancestry.

**Table SA5. PCAdmix Results for TSI and LWK Individuals**

| <b>Panel</b>     | <b>Assignment</b> |            |            |                     |
|------------------|-------------------|------------|------------|---------------------|
|                  | <b>CEU</b>        | <b>NAT</b> | <b>YRI</b> | <b>Not Assigned</b> |
| TSI (88 samples) | 88.51%            | 0.41%      | 0.65%      | 10.43%              |
| LWK (90 samples) | 1.24%             | 0.04%      | 94.28%     | 4.45%               |

## Appendix SB: Statistical Description of the GLM Model

We first consider the case where counts in individuals from a given population are pooled, and where we do not have information about the local ancestry in the genome. The fully saturated model, assuming a logarithmic link function for a Poisson distribution, is then:

$$\text{Log}(\text{Counts}_{AZP}) = \beta + \beta_A + \beta_Z + \beta_P + \beta_{AZ} + \beta_{AP} + \beta_{ZP} + \beta_{AZP}$$

where the  $\beta$  represent fitting parameters in the model subject to the usual constraints

$\beta_A = \beta_Z = \beta_P = \beta_{AZ} = \beta_{AP} = \beta_{ZP} = \beta_{AZP} = 0$  when *either* A=ASW, Z=heterozygous, or P=benign. If the populations have had the same demographic history as the reference genome and polymorphisms are neutral, only  $\beta$  and  $\beta_Z$  would significantly depart from zero. (For example, we'd expect two heterozygous sites for every homozygous nonreference site if the individual and the reference genome were drawn from the same population). Differences in effective population size would lead to significant  $\beta_A$  (i.e., consistently more variation in some genomes than other) and other differences in demographic history, such as recent growth, may lead to significant values for  $\beta_{AZ}$  (i.e., proportionally more homozygous variants in genomes from some populations vs. others). To understand the effect of selection on this model, imagine that all populations are identical and that we have two classes of functional alleles with different selective coefficients. Since selection would keep deleterious alleles at lower frequencies, we expect a significant interaction term  $\beta_{ZP}$  regardless of demographic history. The term  $\beta_{AP}$  represents the fact that populations may bear different levels of deleterious-to-neutral polymorphisms, for example because of differences in effective population sizes. A natural question is then whether linear and pairwise interaction terms will be sufficient to describe the interplay of demography and selection. In other words, a population having experienced a bottleneck is expected to display both proportionally more homozygous nonreference variants, and an increased proportion of deleterious variants. Is the proportion of homozygous deleterious variants in that population simply a product of these two effects?

This model can be fitted to either individual level data or to pooled data across individuals, and can be easily modified to account for diverse covariates. When applying this model to an admixed genome  $I$ , with ancestry proportion  $p_{AI}$  from ancestry A, we expect that each diploid ancestry contributes in proportion to the fraction of the genome it covers:  $\text{Counts}_{IAZP} = p_{AI} \text{Counts}_{AZP}$ , with  $\text{Counts}_{AZP}$  the expected genome-wide counts for a genome of uniform ancestry A. Using  $\beta_{AI} = \text{Log}(p_{AI})$ , this should be easily accounted for by adding an individual-by-diploid ancestry term to our model:

$$\text{Log}(\text{Counts}_{IAZP}) = \beta + \beta_I + \beta_{AI} + \beta_A + \beta_Z + \beta_P + \beta_{AZ} + \beta_{AP} + \beta_{ZP} + \beta_{AZP},$$

(where ancestry A is now drawn from Eur/Eur, Eur/Nam, Afr/Eur, Nam/Nam, Afr/Nam, Afr/Afr, and I is an individual label). In practice, we optimize  $\beta_{AI}$  with the other parameters to account for possible differences in the ancestral populations.

We find that many of the  $\beta_{AZP}$  are highly significant via comparisons of log-likelihood or using the Akaike Information Criteria (AIC), regardless of whether we analyze admixed or nonadmixed genomes (Figure 7, Figure S5, Tables S4–S6). This is illustrated in Figure S6, which shows more Probably Damaging homozygous mutations in the Out-of-Africa populations vs. the African populations beyond that predicted by the overall higher levels of variation in African genomes. Mathematically, this is seen in the coefficients of the regression model and AIC comparison of models. For Z="Homozygous", P="Probably damaging", we find significant coefficients for different values of A: CEU ( $\beta_{AZP} = 0.3031$ ;  $p < 1e-9$ ), CHB ( $\beta_{AZP} = 0.2809$ ;  $p < 5e-8$ ), GIH ( $\beta_{AZP} = 0.2309$ ,  $p < 10e-6$ ) JPT ( $\beta_{AZP} = 0.183$ ,  $p < 0.000354$ ) or TSI ( $\beta_{AZP} = 0.257$ ,  $p < 8e-7$ ) indicating that these ancestries increase the odds of being in a homozygous probably damaging state with respect to ASW ancestry and above that which would be

predicted from ancestry, zygosity, or PolyPhen alone (or their pairwise interactions). Similarly, in the admixed genomes, we find that the odds of being in a Z=homozygous and P=probably damaging state are higher for European ancestry ( $\beta_{AZP} = 0.3422$ ,  $p < 2.49e-07$ ) and Native American ancestry increases the odds ( $\beta_{AZP} = 0.6786$ ,  $p < 7.15e-06$ ) compared to the African ancestry. Segments of joint European/Native admixed ancestry also increase the relative proportion of homozygous probably damaging counts ( $\beta_{AZP}=0.3854$ ,  $p = 5.17e-06$ ), although a significant effect is not observed for African/European and African/Native American. Model comparison using log-likelihood ratio tests or AIC (Table S4) always favor the model where the degree of homozygosity varies across PolyPhen categories in an ancestry-specific manner (i.e., there is a significant nonzero  $\beta_{AZP}$ ) with an improvement in AIC of 30.8 for the comparison of the admixed genomes with ancestry deconvolution and a gain of over 150 for all genomes combined. These observations emphasize the intricate interaction of demography and selection in the generation of world-wide patterns of genomic diversity.
